# Supplementary material for: Design and evaluation of sulfadiazine derivatives as potent dual inhibitors of EGFRWT and EGFRT790M: integrating biological, molecular docking, and ADMET analysis
Source: Royal Society of Chemistry journal article supplement (doi:10.1039/d4ra04165h), 2024-01-01
Supplement: d4ra04165h1.pdf [file d4ra04165h1.pdf]

## Supporting Information

### Design and Evaluation of Sulfadiazine Derivatives as Potent Dual Inhibitors of EGFR<sup>WT</sup> and EGFR<sup>T790M</sup>: Integrating Biological, Molecular Docking, and ADMET Analysis

Hany M. Abd El-Lateef<sup>a,b\*#</sup>, Hend A. A. Ezelarab<sup>c\*#</sup>, Ali M. Ali<sup>b</sup>, Azhaar T. Alsaggaf<sup>d</sup>, Wael A. Mahdi<sup>e</sup>, Sultan Alshehri<sup>e</sup>, Mohamed A. El Hamd<sup>\*f,g</sup>, Moustafa O. Aboelez<sup>\*</sup>.

<sup>a</sup> Department of Chemistry, College of Science, King Faisal University, Al-Ahsa 31982, Saudi Arabia

<sup>b</sup> Department of Chemistry, Faculty of Science, Sohag 82524, Egypt.

<sup>c</sup> Department of Medicinal Chemistry, Faculty of Pharmacy, Minia University, 61519-Minia, Egypt

<sup>d</sup> Department of Chemistry, Taibah University, Madinah, Saudi Arabia.

<sup>e</sup> Department of Pharmaceutics, College of Pharmacy, King Saud University, Riyadh 11451, Saudi Arabia.

<sup>f</sup> Department of Pharmaceutical Chemistry, College of Pharmacy, Shaqra University, Shaqra 11961, Saudi Arabia.

<sup>g</sup> Department of Pharmaceutical Analytical Chemistry, Faculty of Pharmacy, South Valley University, Qena 83523, Egypt.

<sup>h</sup> Department of Pharmaceutical Chemistry, Faculty of Pharmacy, Sohag University, Sohag, Egypt.

### Correspondence to:

\*Prof. Dr Hany M. Abd El-Lateef, [hmahmed@kfu.edu.sa](mailto:hmahmed@kfu.edu.sa), Dr Moustafa O. Aboelez, [drmoustafaaboelez@yahoo.com](mailto:drmoustafaaboelez@yahoo.com), Dr Hend A. A. Ezelarab, [hend\\_aly@minia.edu.eg](mailto:hend_aly@minia.edu.eg), Dr Mohamed A. El Hamd, [aboelhamdmohamed@su.edu.sa](mailto:aboelhamdmohamed@su.edu.sa).

# Equal contributed

## **1. Experimental part**

### **1.1. Chemistry**

#### **1.1.1. General Information**

All commercially available reagents were purchased from Merck, Aldrich and Fluka and were used without further purification. All reactions were monitored by thin layer chromatography (TLC) using precoated plates of silica gel G/UV-254 of 0.25 mm thickness (Merck 60F254) using UV light (254 nm/365 nm) for visualization. Melting points were detected with a Kofler melting points apparatus and uncorrected. Infrared spectra were recorded with a FT-IR-ALPHABROKER-Platinum-ATR spectrometer and are given as  $\text{cm}^{-1}$  using the attenuated total reflection (ATR) method.  $^1\text{H}$  NMR and  $^{13}\text{C}$  NMR spectra for all new compounds were recorded in  $\text{DMSO-}d_6$  on a Bruker Bio Spin AG spectrometer at 400 MHz and 100 MHz, respectively. For  $^1\text{H}$  NMR, chemical shifts ( $\delta$ ) were given in parts per million (ppm) with reference to tetramethylsilane (TMS) as an internal standard ( $\delta=0$ ); coupling constants ( $J$ ) were given in hertz (Hz) and data are reported as follows: chemical shift, integration, multiplicity (s=singlet, d=doublet, t= triplet, m=multiplet). For  $^{13}\text{C}$  NMR, TMS ( $\delta=0$ ) or DMSO ( $\delta=39.51$ ) was used as internal standard and spectra were obtained with complete proton decoupling. Elemental analyses were obtained on a Perkin-Elmer CHN-analyzer model.

### **1.2. Biological Evaluation**

#### **1.2.1. In vitro anti-proliferative activities**

*In vitro* cytotoxicity activities of the target compounds were investigated quantitatively against three cancer cell lines, namely human epidermoid carcinoma cells (A431) and non-small cell lung cancer cells (A549 and H1975), applying the MTT method. Commercially available drugs (erlotinib, gefitinib, and osimertinib) are the standard references. The investigated cell lines were supplied by the American Type Culture Collection (ATCC) (Rockville, MD). The MTT assay is a common test for evaluating tumor growth and assessing the cytotoxicity of drug candidates and other toxic substances. In conclusion, yellow MTT is reduced through mitochondrial dehydrogenases in living tissue to generate purple formazan. A proper solvent dissolves the non-soluble purple formazan product into a colored solution. The absorbance of this purple formazan solution was evaluated at a specific wavelength. Once the portion of purple formazan released by cells allowed to be treated with an agent is compared to that of untreated control cells, the agent's efficiency in provoking cell death can be calculated by generating a dose-response relationship curve. Human cancer cell lines were implanted in 96-well plates at a dose of  $3-8 \times 10^3$  cells per well. The

wells were then incubated at 37 °C for 12 hours in a 5% CO<sub>2</sub> incubator. To determine the DMSO level, each well's culture medium was replaced with 0.1 ml of new medium containing graded quantities of the target compounds. Following a two-day hatching time, the cells were matured in 100 µl MTT solution (5 µg ml<sup>-1</sup>) for four hours in each well. After dissolving MTT-formazan crystals in 100 µl DMSO, the absorption intensity was determined photometrically at 490 nm using an automated ELISA reader system (TECAN, CHE). The IC<sub>50</sub> values then were determined using nonlinear regression fitting models (Graph Pad, Prism Version 5) (n = 3, duplicate trials, reported as mean SD).

The investigated cell lines were incubated in RPMI-1640 media with 10% inactivated FBS, 50 µg/mL of gentamycin, 50 units/mL of penicillin, and 1 mmol/L of L-glutamine. The cultures were cultivated 2-3 times per week and kept at room temperature in a humidified environment with 5% carbon dioxide at densities of 3–8 × 10<sup>3</sup> cells/well on 96-well plates. After filling the fresh medium (0.1 mL) with the graduated concentrations of the target degraders very well, the culture medium was incubated for two days. The cultured cells on each plate received 100 µL of MTT solution (5.0 µg mL<sup>-1</sup>) and were left for four hours. Employing an automated ELISA reader system (TECAN, CHE), the MTT-formazan crystals were dissolved in 100 µL of DMSO, and the absorbance of each collected well was detected at 490 nm. The formula employed to estimate surviving cells and inhibitory cells was as follows:

$$\% \text{ Surviving cell} = \frac{\text{Mean optical density (OD) of tested compound}}{\text{Mean OD of negative control}} \times 100$$

$$\% \text{ Inhibiting cells} = 100 - \text{Surviving cells}$$

Moreover, nonlinear regression fitting models were employed to compute the IC<sub>50</sub> values (GraphPad, Prism 5). The obtained numerical data were calculated by using the average of three individual duplicate experiments and presented as the mean ± standard deviations (SD).

### **1.2.2. EGFR<sup>WT</sup> and EGFR<sup>T790M</sup> kinase inhibitory assay**

When significant IC<sub>50</sub> values versus target cell lines were identified, the inhibitory activity of derivatives versus both EGFR<sup>WT</sup> and EGFR<sup>T790M</sup> was studied more. In this study, the HTRF test with EGFR<sup>WT</sup> and EGFR<sup>T790M</sup> (Sigma) was performed. For the first 5 minutes, the compounds (1-7) were incubated in the enzymatic buffer with EGFR<sup>WT</sup> and/or EGFR<sup>T790M</sup> and their substrates. To start the enzymatic activity, 1.65 M ATP was allowed to react. The reaction runs for half an hour at 210 K. When EDTA-containing testing reagents were introduced, the procedure was halted. After a one-hour detection period, the IC<sub>50</sub> values were computed by GraphPad Prism 5.0 program. Each concentration was evaluated using three different ways<sup>37,38</sup>.

### 1.3. *In silico* studies

#### 1.3.1. Molecular Docking Study

Compounds **8**, **12**, and **14** were designed and docked in the ATP active site of both EGFR<sup>WT</sup> and EGFR<sup>T790M</sup> protein kinases (PDB ID: **4HJO** and **3W2O**, respectively) (downloaded from the PDB website (Protein Data Bank)) using the Molecular Operating Environment (MOE 2019.) program as reported in the literature. The root mean square deviation (RMSD) values of erlotinib and TAK-285 secondly docked analogs and co-localized conformers, respectively, were 1.4 and 1.85 Å, respectively, illustrating the rationality of this docking protocol (Fig. **1S** and **5S**, respectively, in supporting information). Additionally, gefitinib and osimertinib as reversible first- and irreversible third-generation EGFR inhibitors were docked versus wild and mutant EGFR, respectively, to elucidate their potential dual EGFR inhibitory activities. Erlotinib, the co-localized ligand, was principally dipped into its corresponding co-crystallized protein model (PDB code: **4HJO**) to evaluate if MOE could replicate the native ligand superimposition to the wild EGFR protein active site (Fig. **1S** and **2S**, and **Table 3**). Besides, the native and re-imposed derivatives are docked in the same way with the key amino acids. The energy score of the bonded re-docked drug ( $\Delta G$ ) was  $-6.83$  Kcal/mol with a good RMSD value of 1.4 Å.

Regarding the co-crystallized ligand TAK-285, the co-localized ligand was primarily dipped into its corresponding EGFR<sup>T790M</sup> adenine binding pocket of the co-crystal protein model (PDB code:**3W2O**) to assess if MOE could replicate the native ligand superimposition to the EGFR<sup>T790M</sup> protein active site (Fig. **5S** and **Table 4**). Moreover, the native and re-docked derivatives are docked in the same way with the key AAs. The bonded re-docked TAK-285 binding score ( $\Delta G$ ) equals to  $-7.35$  Kcal/mol with a good RMSD value of 3.01 Å. Also, osimertinib re-docked in the same manner as the re-docked ligand TAK-285 and the other reference drug gefitinib,

#### 1.3.2. ADMET Estimation

The physicochemical properties, lipophilicity (logP value), hydrophilicity calculations, pharmacokinetic characters such as GI absorption and CYP enzyme inhibition, drug-likeness and medicinal chemistry parameters such as the lead likeness of the most potent compounds **8** and **12** compared to the references Erlotinib and Gefitinib; were performed via using the SwissADME online website (<http://www.swissadme.ch/>)<sup>57</sup>. Toxicity parameters of these potent compounds were investigated through the pkCSM-pharmacokinetics website (<http://biosig.unimelb.edu.au/pkcsm/>)<sup>57-61</sup>.

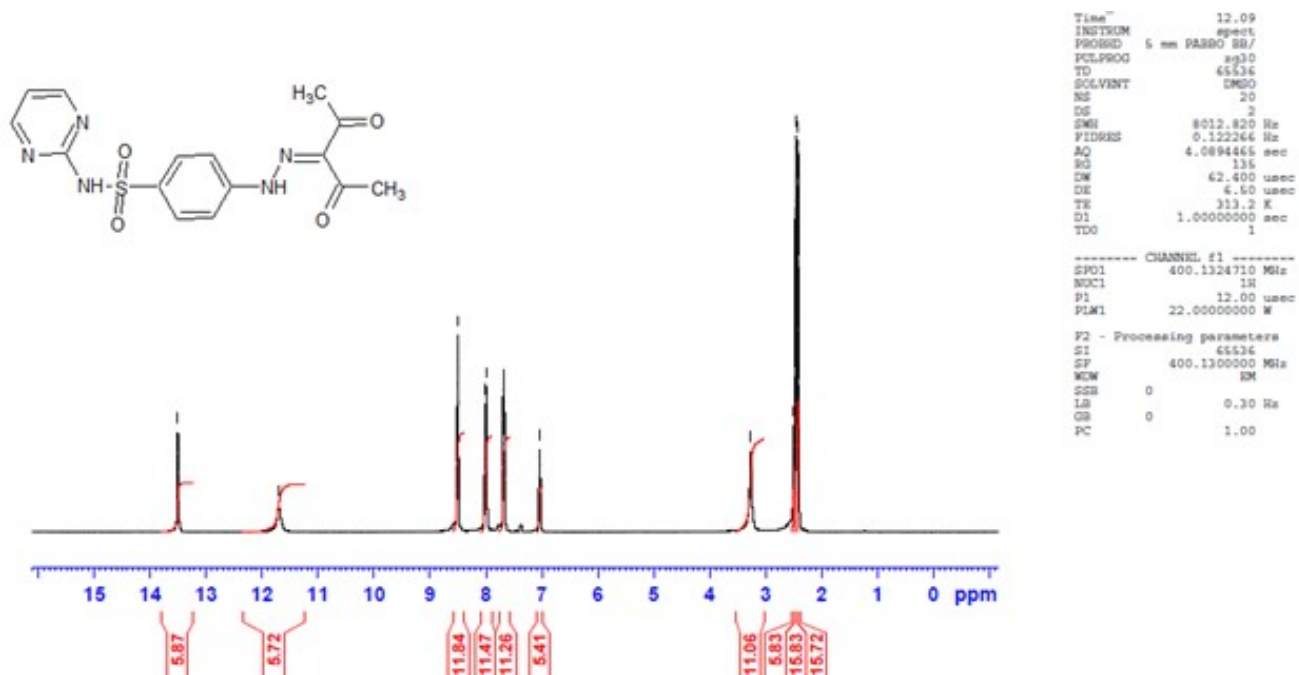

**Figure s1:**  $^1\text{H}$  NMR spectrum of compound **6**

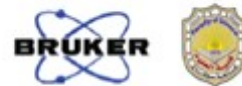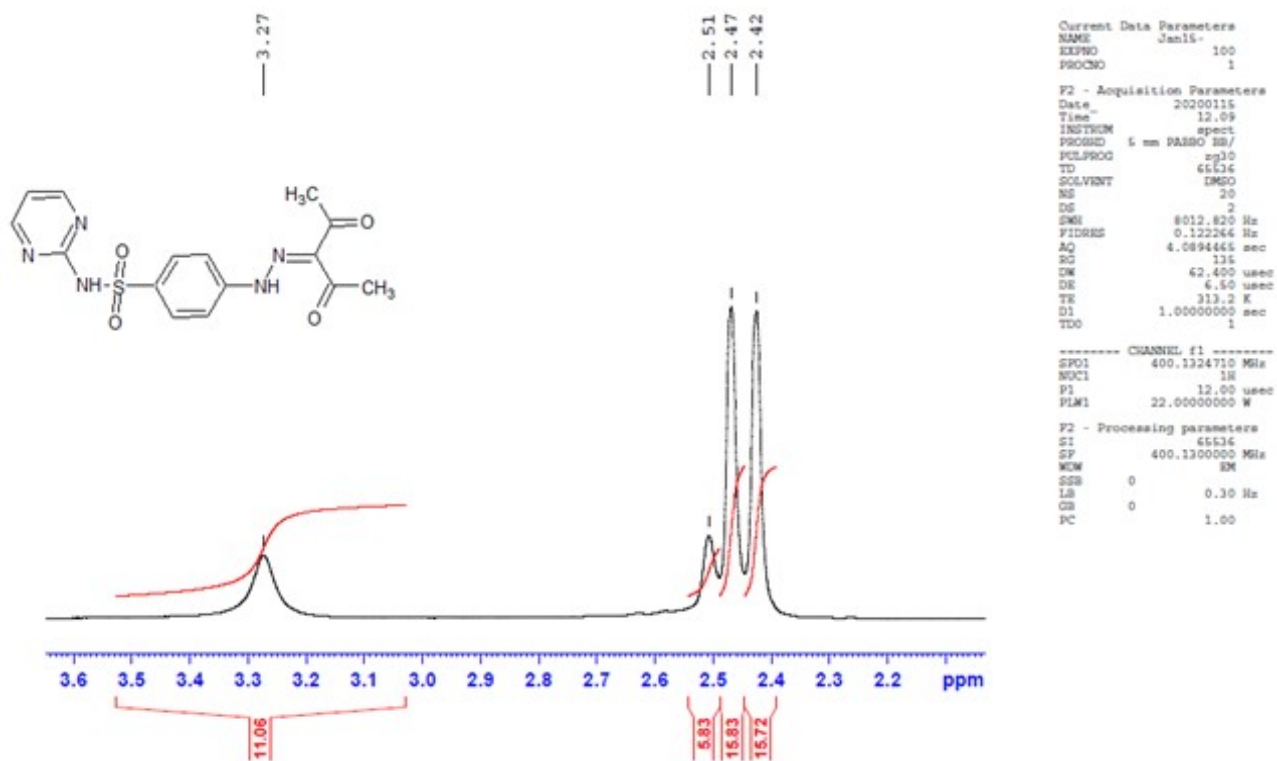

Figure s1: <sup>1</sup>H NMR spectrum of compound 6

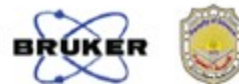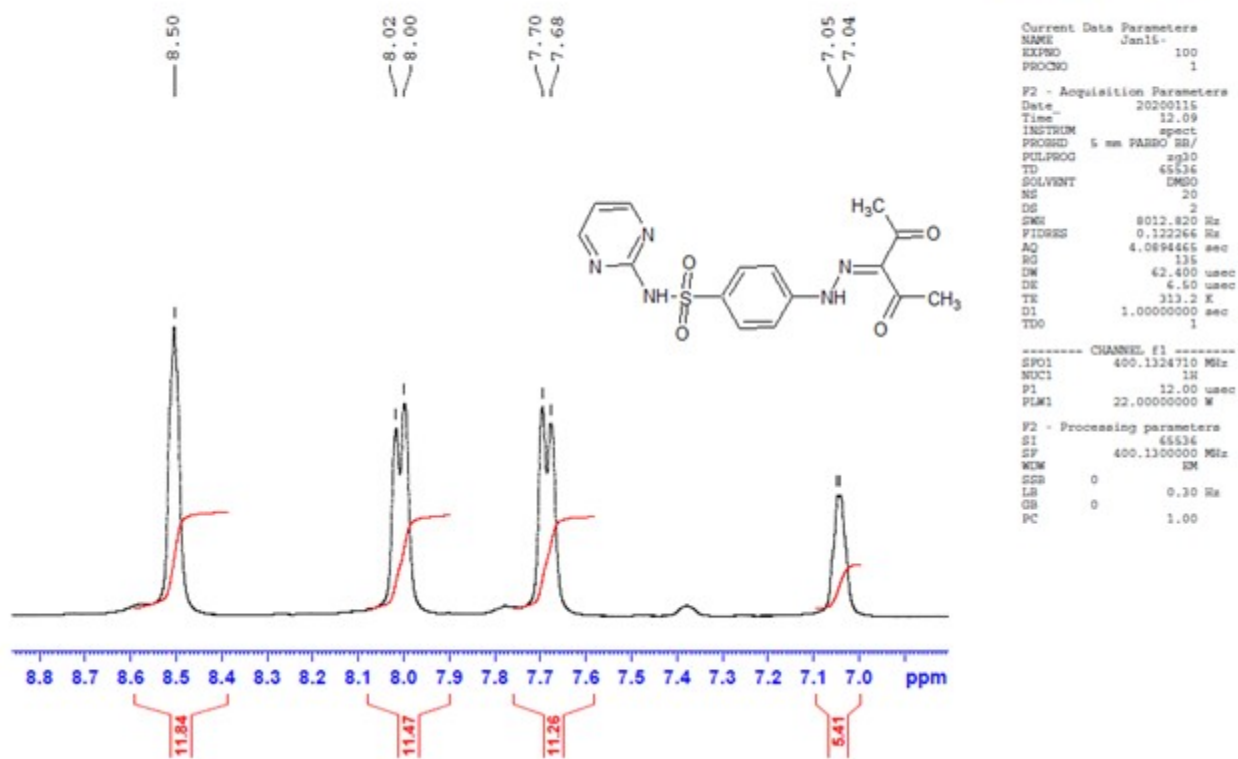

Figure s1: <sup>1</sup>H NMR spectrum of compound 6

SD-2  
D2O  
proton\_su DMSO {C:\nmr-data} Student 6

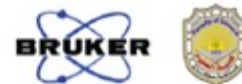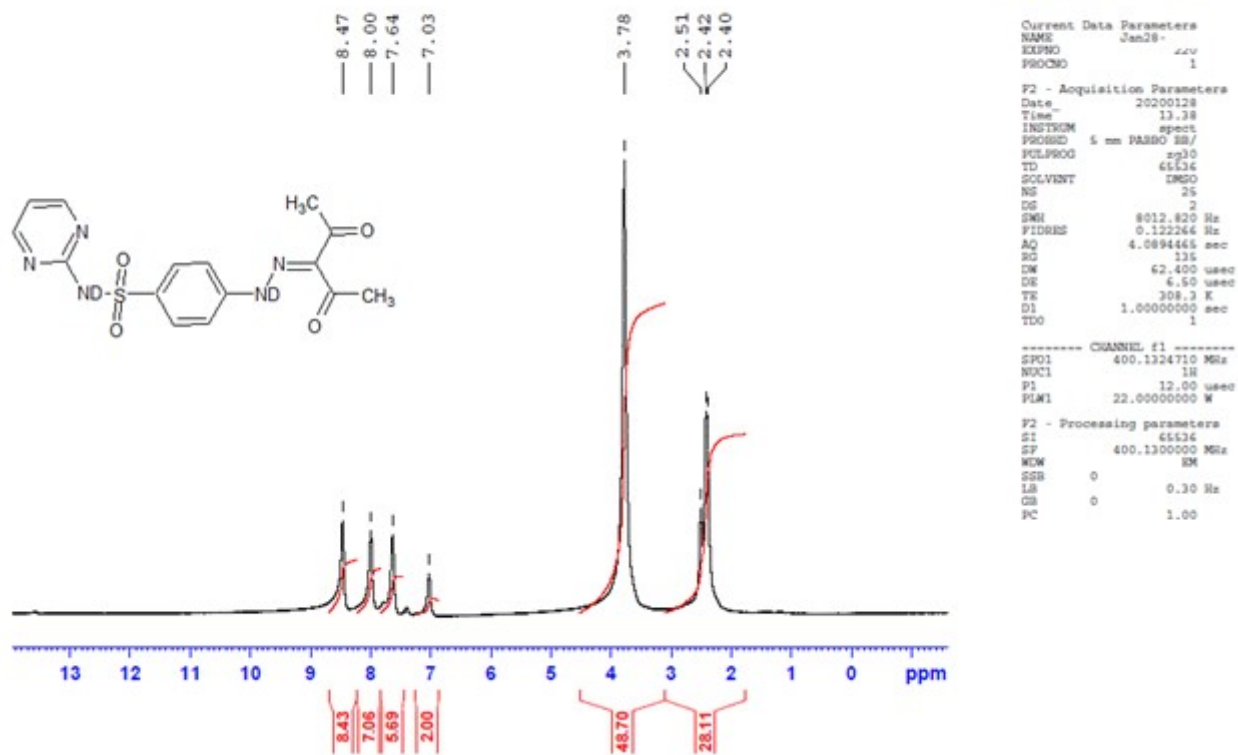

Figure s1:  $^1\text{H}$  NMR (D<sub>2</sub>O) spectrum of compound 6



SD-2  
 c13\_su DMSO (C:\nmr-data) Student 7

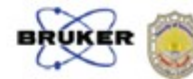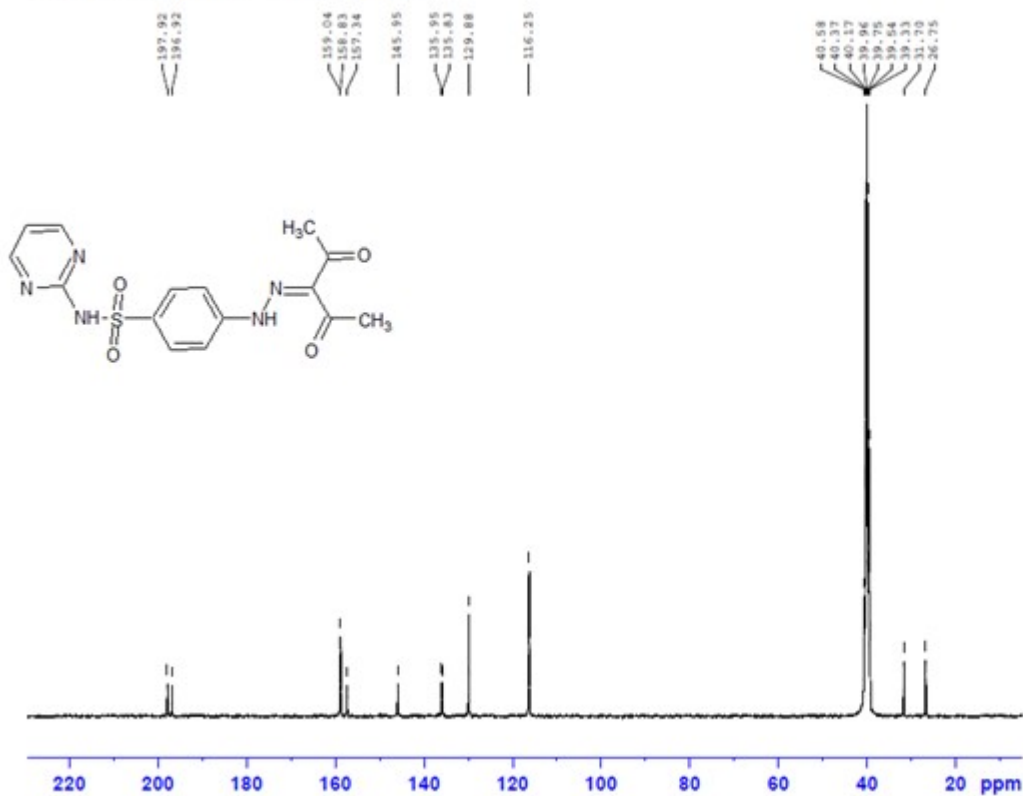

Current Data Parameters  
 NAME Jan23-  
 EXPNO 150  
 PROCNO 1

F2 - Acquisition Parameters  
 Date\_ 20200125  
 Time 4.58  
 INSTRUM spect  
 PROBHD 5 mm PABBO BB/  
 PULPROG zgpg30  
 TD 65536  
 SOLVENT DMSO  
 NS 1200  
 DS 4  
 SWH 24038.461 Hz  
 FIDRES 0.366798 Hz  
 AQ 1.3631488 sec  
 RG 87.69  
 DW 20.800 usec  
 DE 6.50 usec  
 TE 295.7 K  
 D1 2.00000000 sec  
 D11 0.03000000 sec  
 TDO 1

\*\*\*\*\* CHANNEL f1 \*\*\*\*\*  
 SFO1 100.6238364 MHz  
 NUC1 13C  
 P1 9.50 usec  
 PLW1 56.00000000 W

\*\*\*\*\* CHANNEL f2 \*\*\*\*\*  
 SFO2 400.1316005 MHz  
 NUC2 1H  
 CPDPRG[2] waltz16  
 PCPD2 90.00 usec  
 PLW2 22.00000000 W  
 PLW12 0.41091001 W  
 PLW13 0.33284000 W

F2 - Processing parameters  
 SI 32768  
 SF 100.6127690 MHz  
 WDW EM  
 SSB 0  
 LB 6.00 Hz  
 GB 0  
 PC 1.40

Figure s2: <sup>13</sup>C NMR spectrum of compound 6

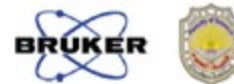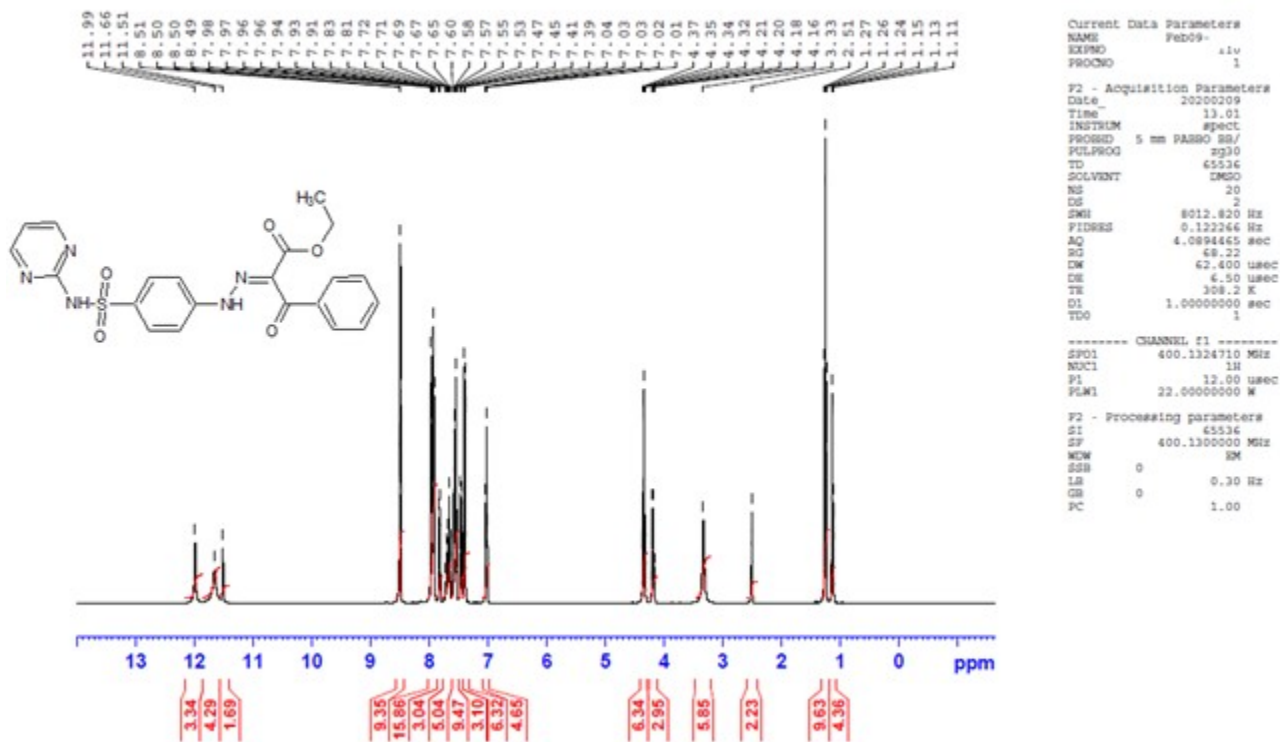

Figure s3: <sup>1</sup>H NMR spectrum of compound 7

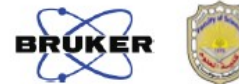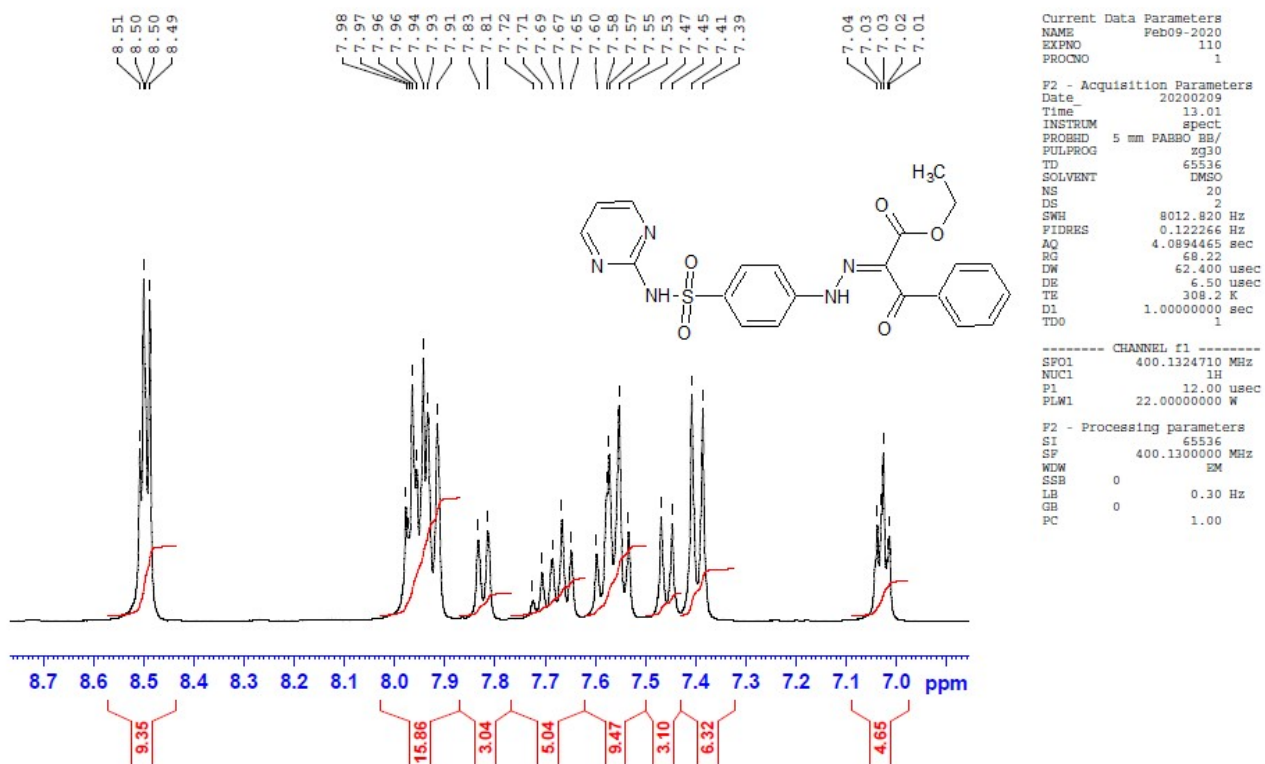

Figure s3: <sup>1</sup>H NMR spectrum of compound 7

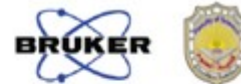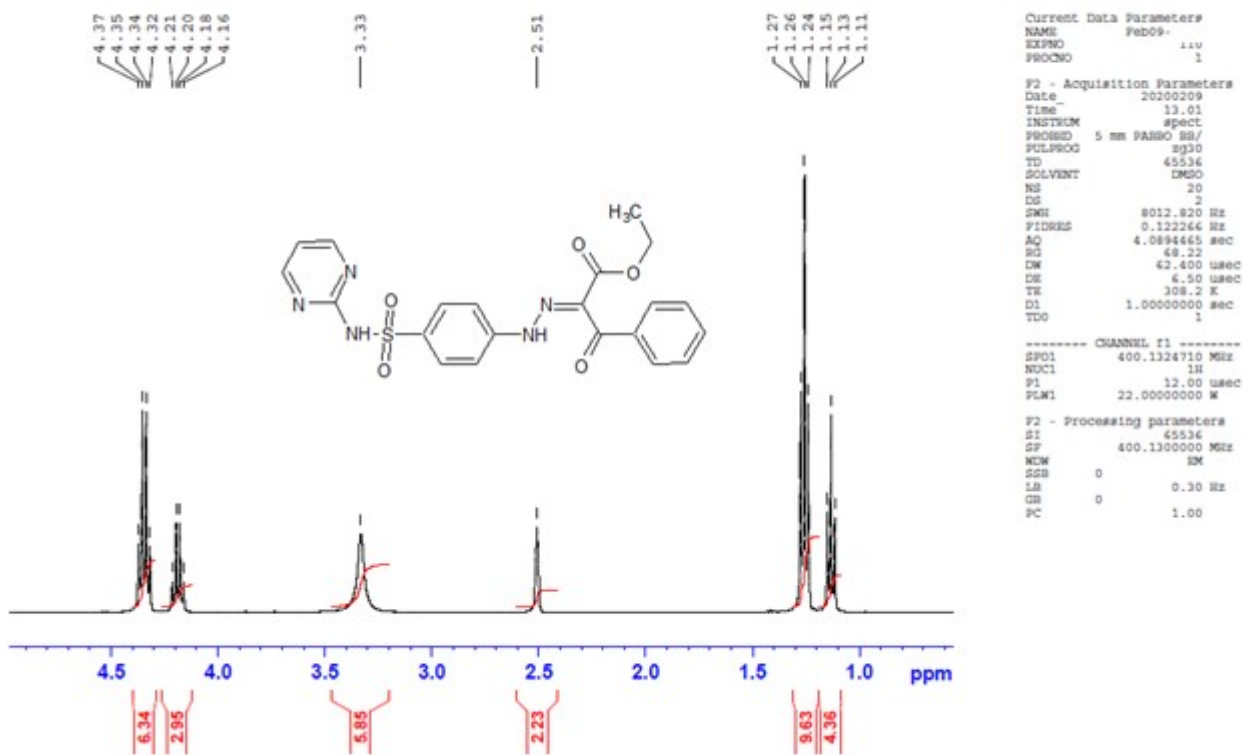

Figure s3: <sup>1</sup>H NMR spectrum of compound 7

SD-8-R  
 c13\_su DMSO (C:\nmr-data) Student 6

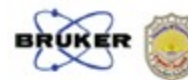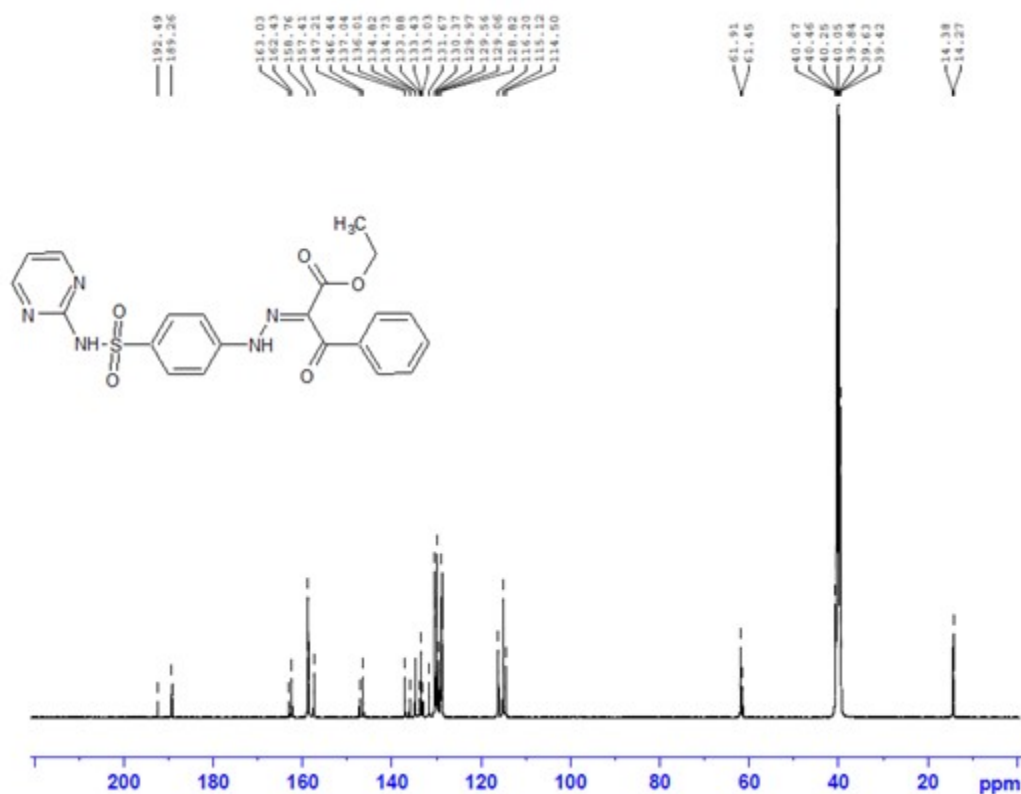

Current Data Parameters  
 NAME Feb13-  
 EXPNO 110  
 PROCNO 1

F2 - Acquisition Parameters  
 Date\_ 20200215  
 Time 8.37  
 INSTRUM spect  
 PROBHD 5 mm PABBO BB/  
 PULPROG zgpg30  
 TD 65536  
 SOLVENT DMSO  
 NS 2500  
 DS 4  
 SWH 24038.461 Hz  
 FIDRES 0.366798 Hz  
 AQ 1.3631488 sec  
 RG 100.43  
 DW 20.800 usec  
 DE 6.50 usec  
 TE 308.2 K  
 D1 2.00000000 sec  
 D11 0.03000000 sec  
 TDO 1

\*\*\*\*\* CHANNEL f1 \*\*\*\*\*  
 SFO1 100.6238364 MHz  
 NUC1 13C  
 P1 9.50 usec  
 PLW1 56.00000000 W

\*\*\*\*\* CHANNEL f2 \*\*\*\*\*  
 SFO2 400.1316005 MHz  
 NUC2 1H  
 CPDPRG2 waltz16  
 PCPD2 90.00 usec  
 PLM2 22.00000000 W  
 PLM12 0.41091001 W  
 PLM13 0.33284000 W

F2 - Processing parameters  
 SI 32768  
 SP 100.6127690 MHz  
 WDW EM  
 SSB 0  
 LB 6.00 Hz  
 GB 0  
 PC 1.40

Figure s4: <sup>13</sup>C NMR Spectrum of compound 7

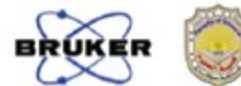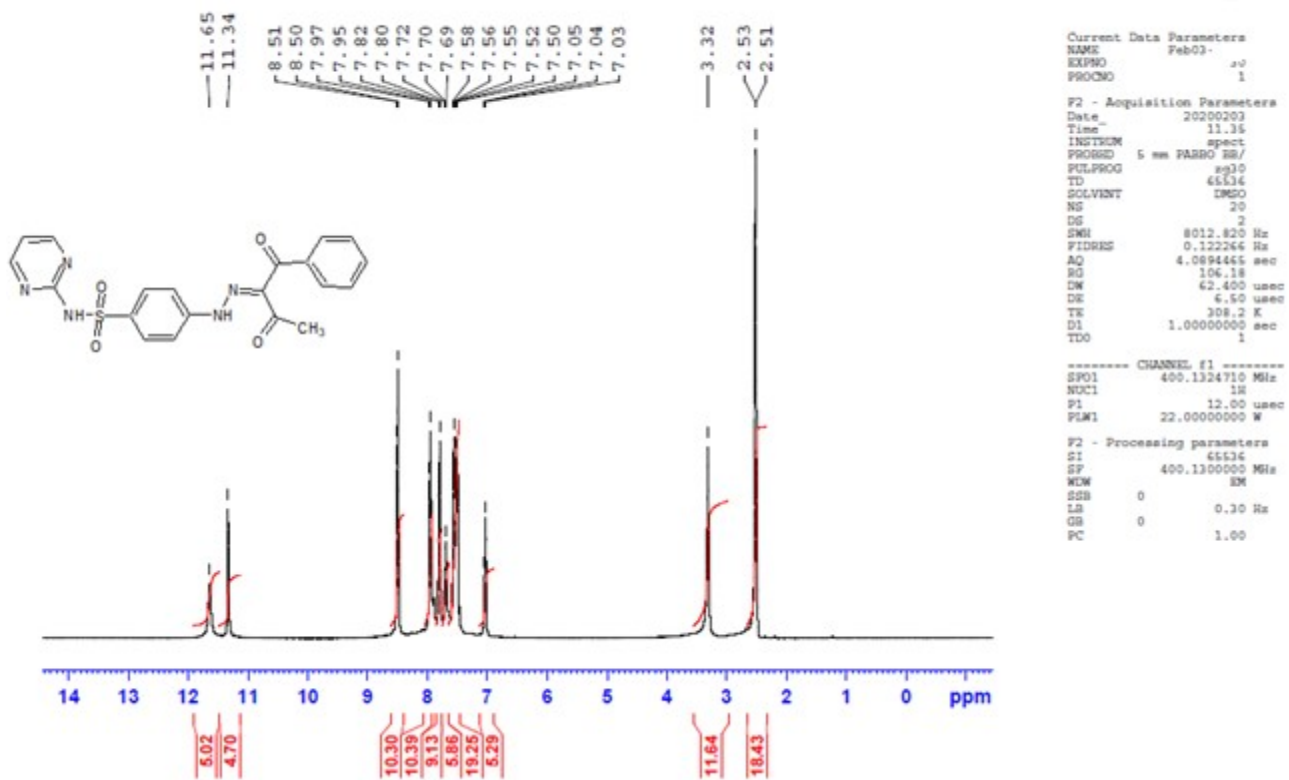

Figure s5: <sup>1</sup>H NMR spectrum of compound 8

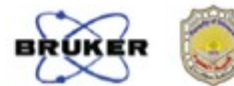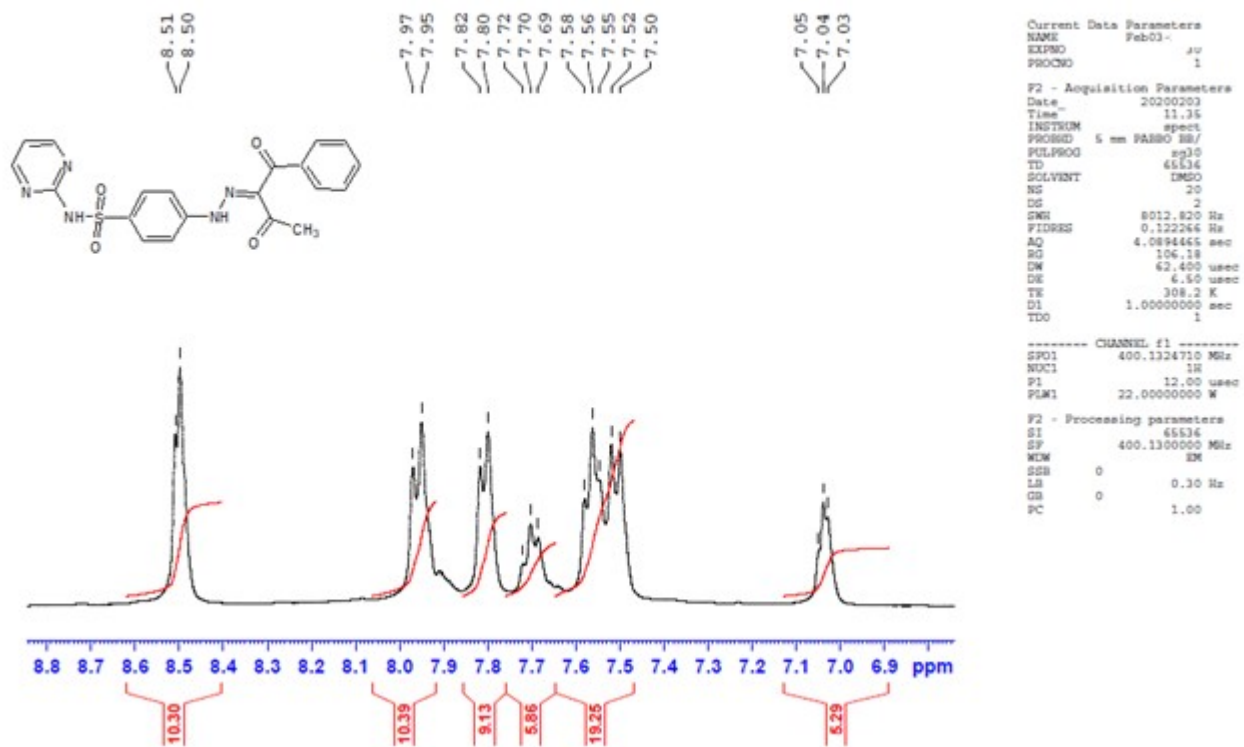

Figure s5: <sup>1</sup>H NMR spectrum of compound 8

SD-5  
 c13\_su DMSO {C:\nmr-data} Student 3

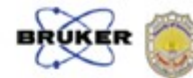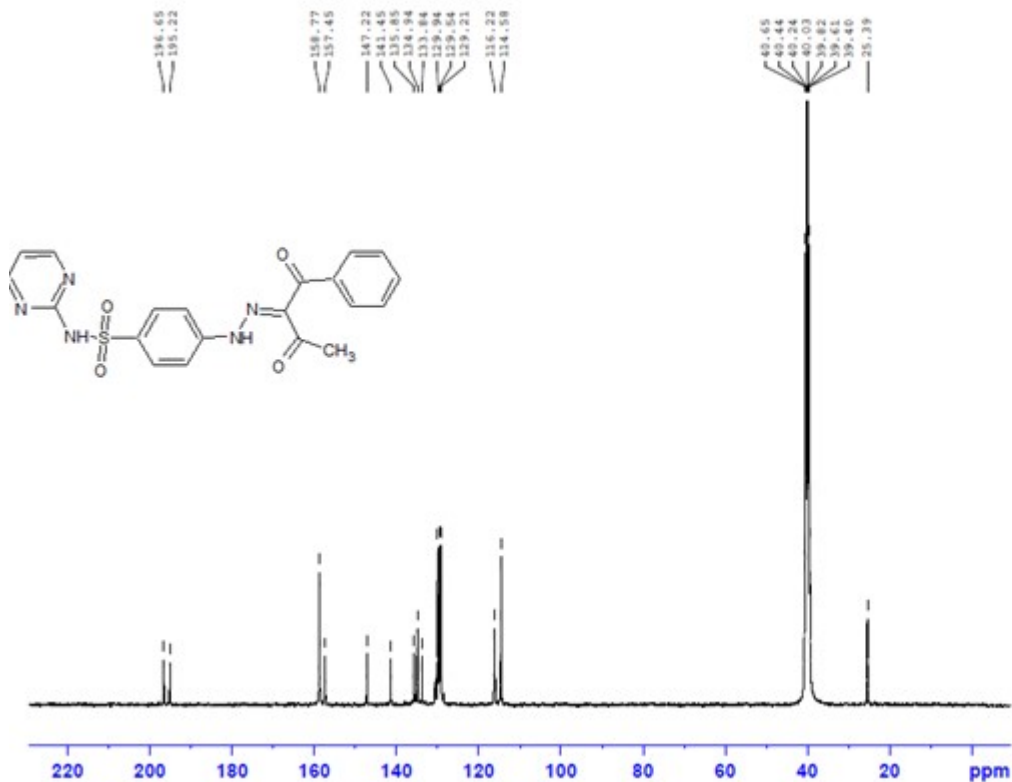

Current Data Parameters  
 NAME Feb13-  
 EXPNO 00  
 PROCNO 1

F2 - Acquisition Parameters  
 Date\_ 20200215  
 Time 1.19  
 INSTRUM spect  
 PROBRD 5 mm PABBO BB/  
 PULPROG zgpg30  
 TD 65536  
 SOLVENT DMSO  
 NS 2500  
 DS 4  
 SWH 24038.461 Hz  
 FIDRES 0.366798 Hz  
 AQ 1.3631488 sec  
 RG 100.42  
 DW 20.800 usec  
 DE 6.50 usec  
 TE 308.2 K  
 D1 2.00000000 sec  
 D11 0.03000000 sec  
 TDO 1

===== CHANNEL f1 =====  
 SFO1 100.6238364 MHz  
 NUC1 13C  
 P1 9.50 usec  
 PLM1 56.00000000 W

===== CHANNEL f2 =====  
 SFO2 400.1316005 MHz  
 NUC2 1H  
 CPDPRG2 waltz16  
 PCPD2 90.00 usec  
 PLM2 22.00000000 W  
 PLM12 0.41091001 W  
 PLM13 0.33284000 W

F2 - Processing parameters  
 SI 32768  
 SF 100.6127690 MHz  
 WDW EM  
 SSR 0  
 LB 6.00 Hz  
 GB 0  
 PC 1.40

Figure s6: <sup>13</sup>C NMR Spectrum of compound 8



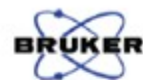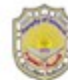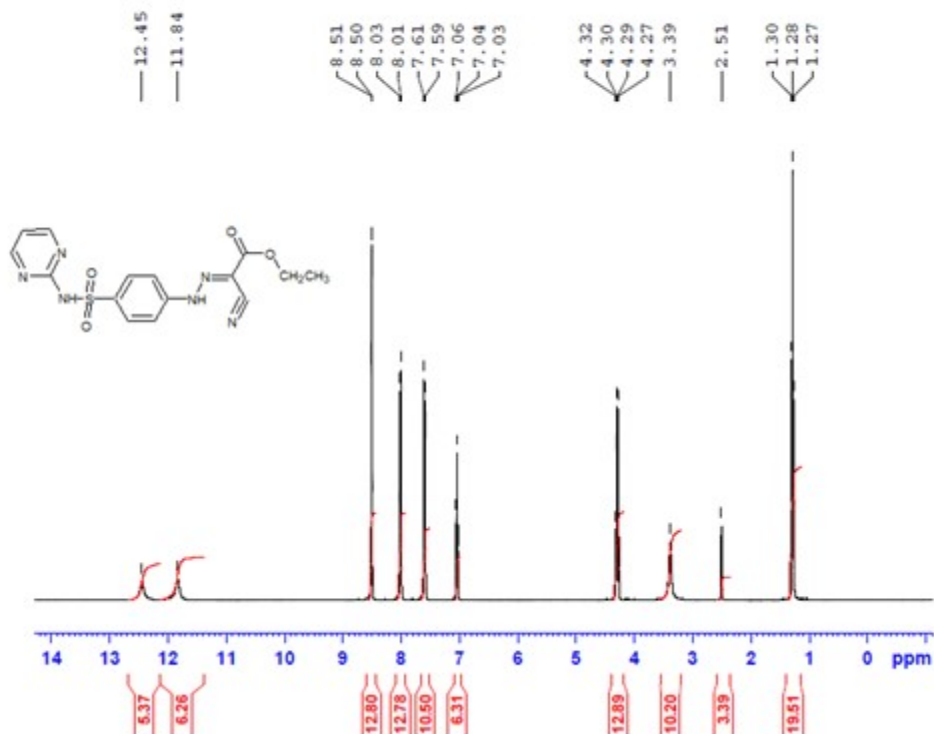

Current Data Parameters  
NAME Jan19-  
EXPNO 1  
PROCNO 1

F2 - Acquisition Parameters  
Date\_ 20200119  
Time 10.41  
INSTRUM spect  
PROBHD 5 mm PABBO 2H/  
PULPROG zg30  
TD 65536  
SOLVENT DMSO  
NS 20  
DS 2  
SWH 8012.820 Hz  
FIDRES 0.122264 Hz  
AQ 4.0894461 sec  
RG 68.22  
DM 62.400 usec  
DE 6.50 usec  
TE 294.4 K  
D1 1.0000000 sec  
TD0 1

----- CHANNEL f1 -----  
SFO1 400.1324710 MHz  
NUC1 1H  
P1 12.00 usec  
PLM1 22.0000000 W

F2 - Processing parameters  
SI 65536  
SF 400.1300000 MHz  
WUM 3M  
SGB 0  
LB 0.30 Hz  
GB 0  
PC 1.00

Figure s7: <sup>1</sup>H NMR spectrum of compound 9

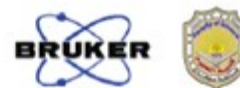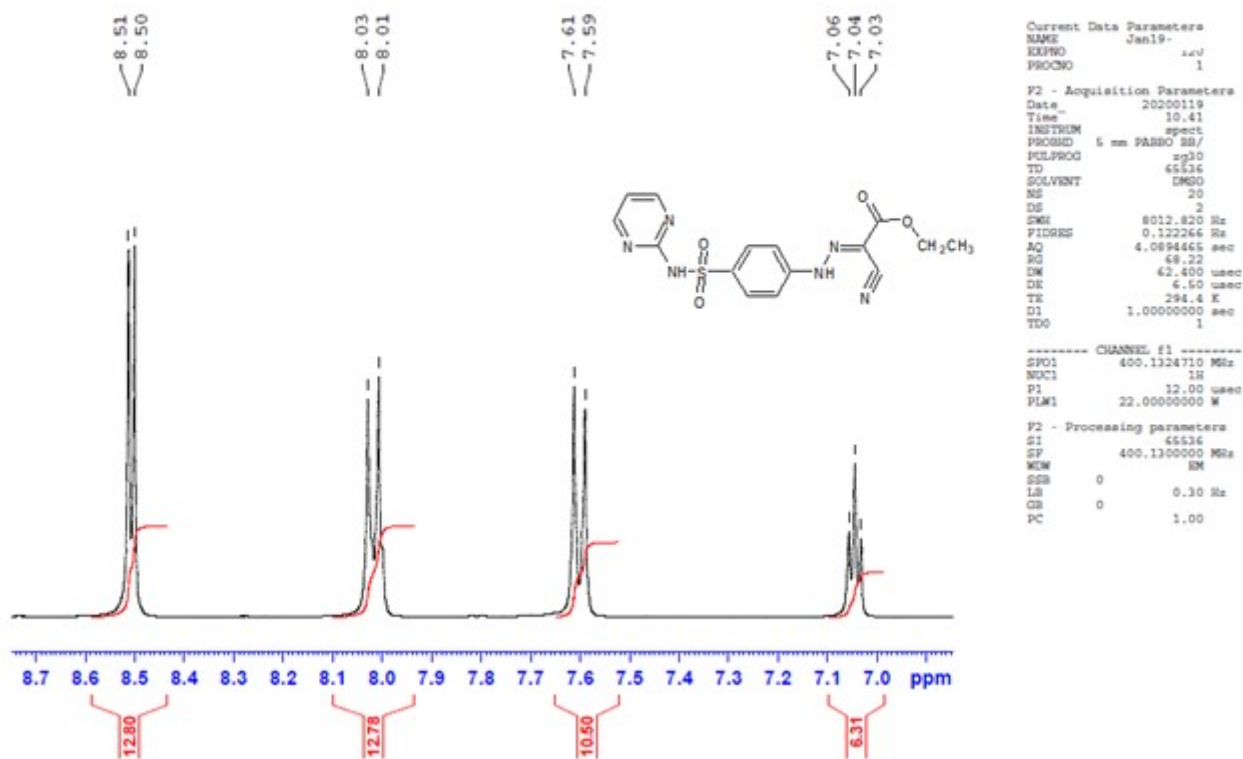

Figure s7: <sup>1</sup>H NMR spectrum of compound 9

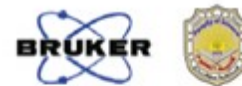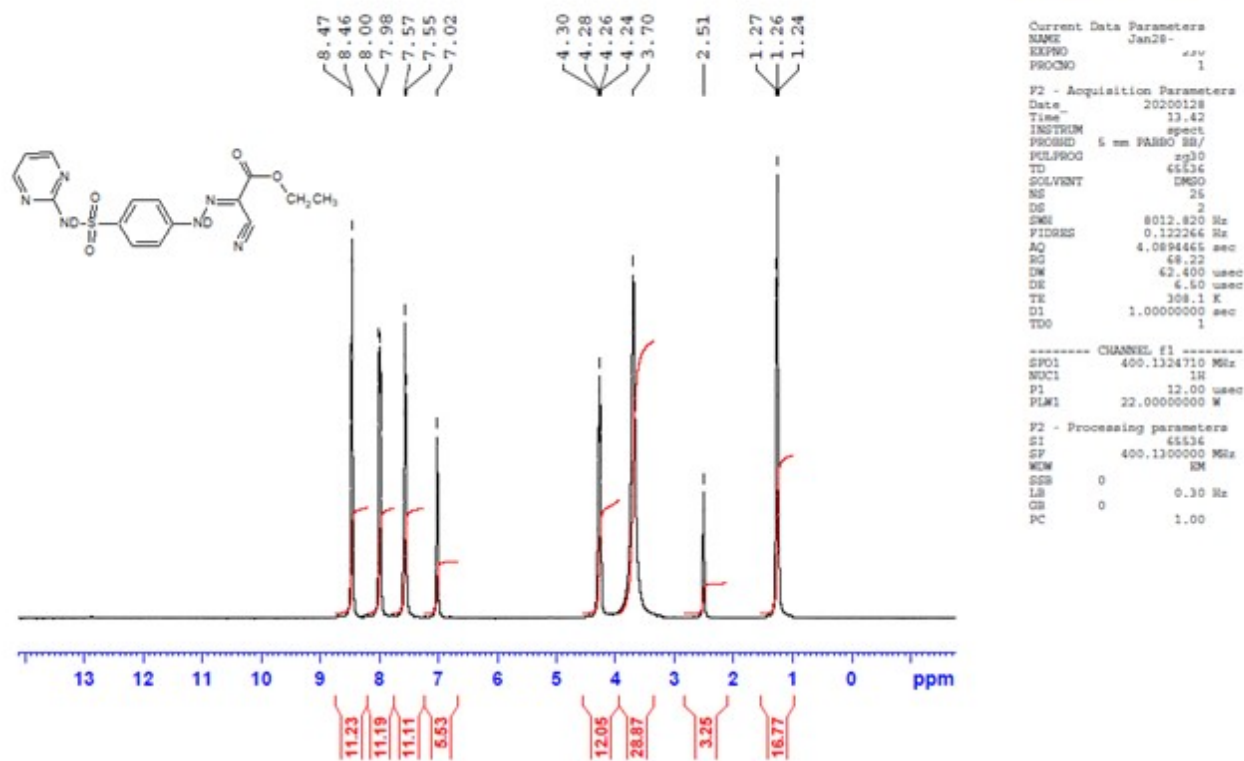

Figure s7: <sup>1</sup>H NMR (D2O) spectrum of compound 9

SD-3  
c13\_su DMSO {C:\nmr-data} Student 6

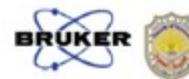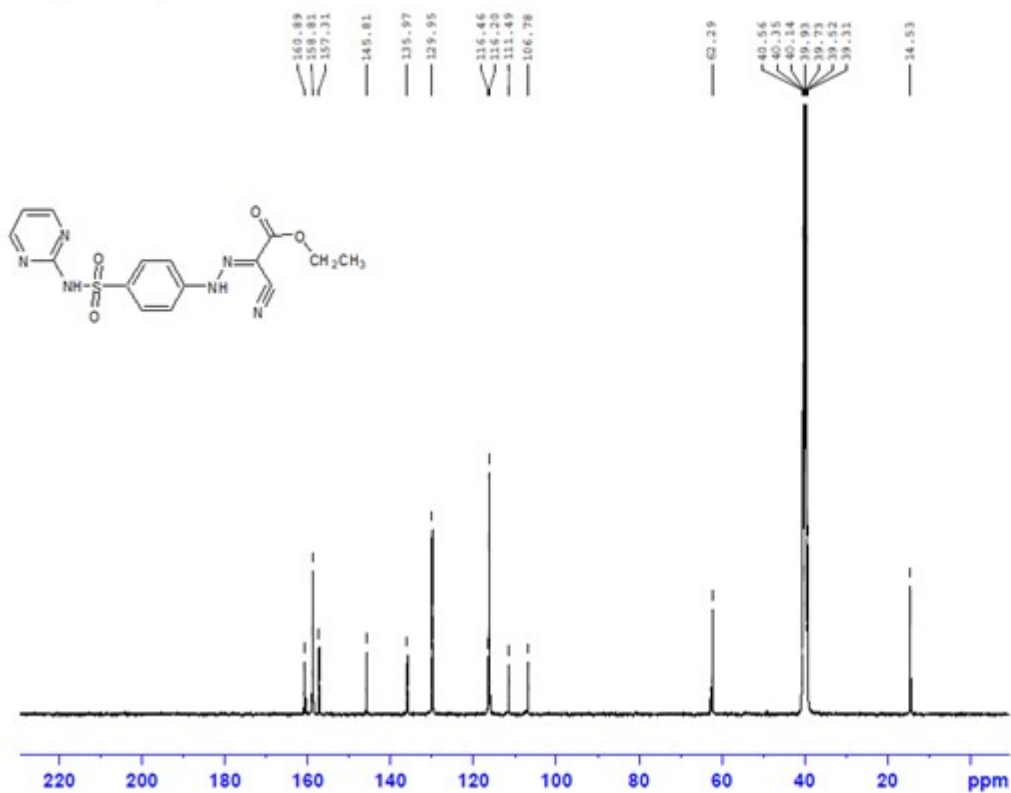

Current Data Parameters  
NAME Jan23-  
EXPNO 1  
PROCNO 1

F2 - Acquisition Parameters  
Date 2020125  
Time 3.45  
INSTRUM spect  
PROBHD 5 mm PAIR0 BB/  
PULPROG zgpg30  
TD 65536  
SOLVENT DMSO  
NS 1200  
DS 4  
SWH 24038.461 Hz  
FIDRES 0.366798 Hz  
AQ 1.3631488 sec  
RG 100.43  
DM 20.800 usec  
DE 6.50 usec  
TE 295.8 K  
D1 2.00000000 sec  
D11 0.03000000 sec  
TDO 1

===== CHANNEL f1 =====  
SFO1 100.6238364 MHz  
NUC1 13C  
P1 9.50 usec  
PLW1 56.00000000 W

===== CHANNEL f2 =====  
SFO2 400.1316005 MHz  
NUC2 1H  
CPDPRG2 waltz16  
PCPD2 90.00 usec  
PLW2 22.00000000 W  
PLW12 0.41091001 W  
PLW13 0.33284000 W

F2 - Processing parameters  
SI 32768  
SF 100.6127690 MHz  
WDW EM  
SSB 0  
LB 6.00 Hz  
GB 0  
PC 1.40

Figure s8: <sup>13</sup>C NMR Spectrum of compound 9

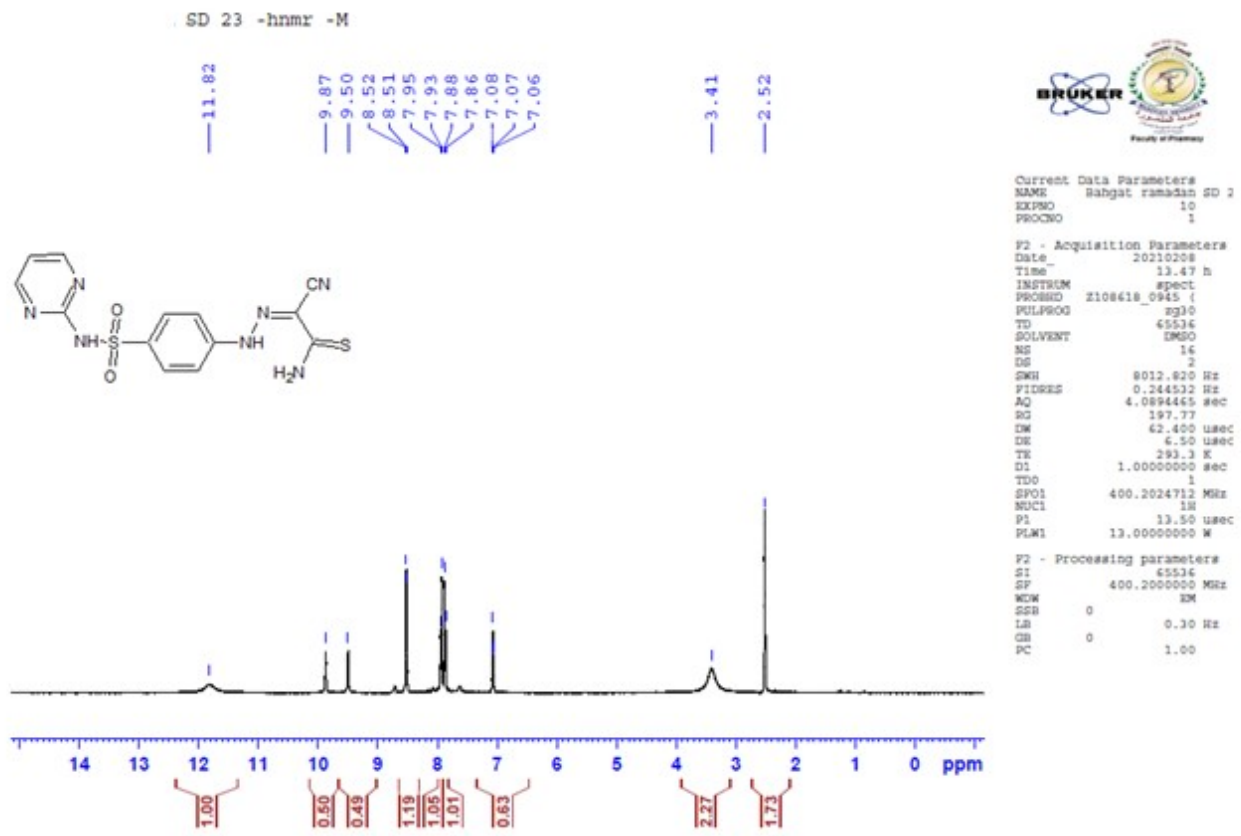

Figure s9: <sup>1</sup>H NMR spectrum of compound 10

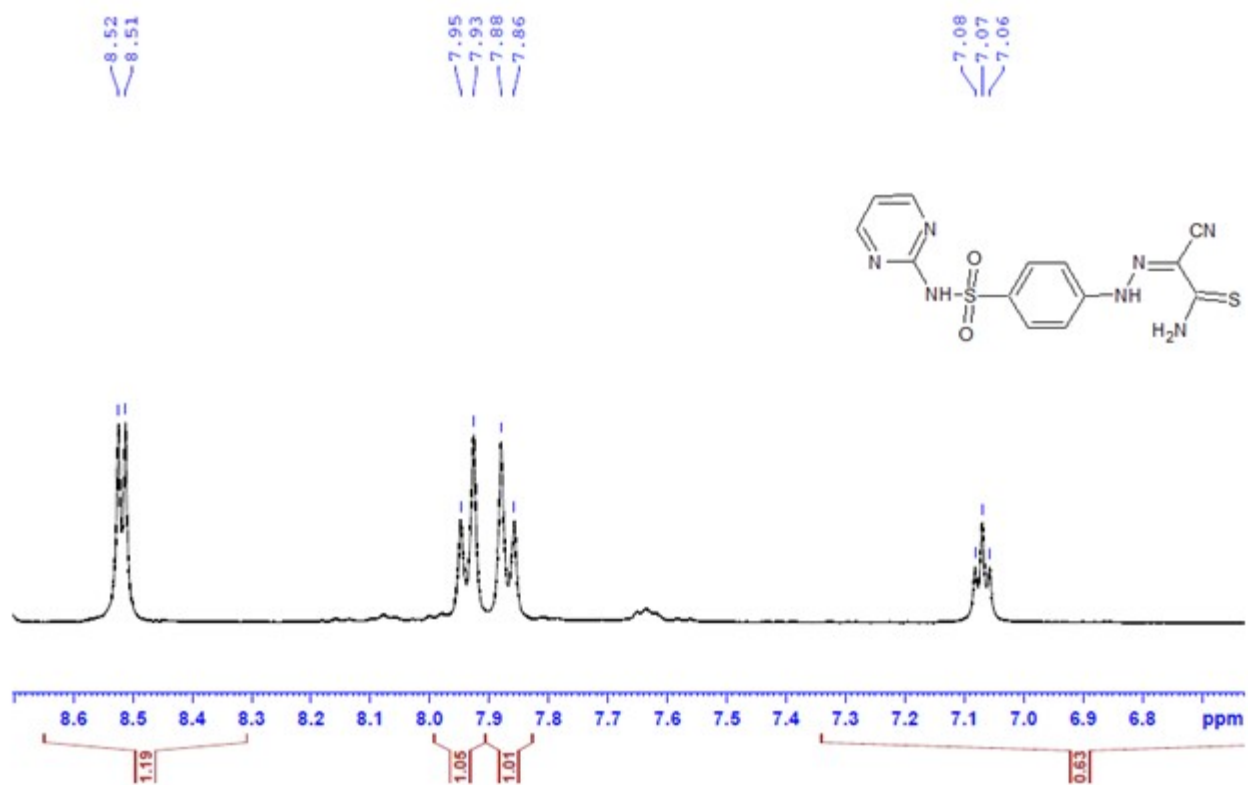

Figure s9: <sup>1</sup>H NMR spectrum of compound 10

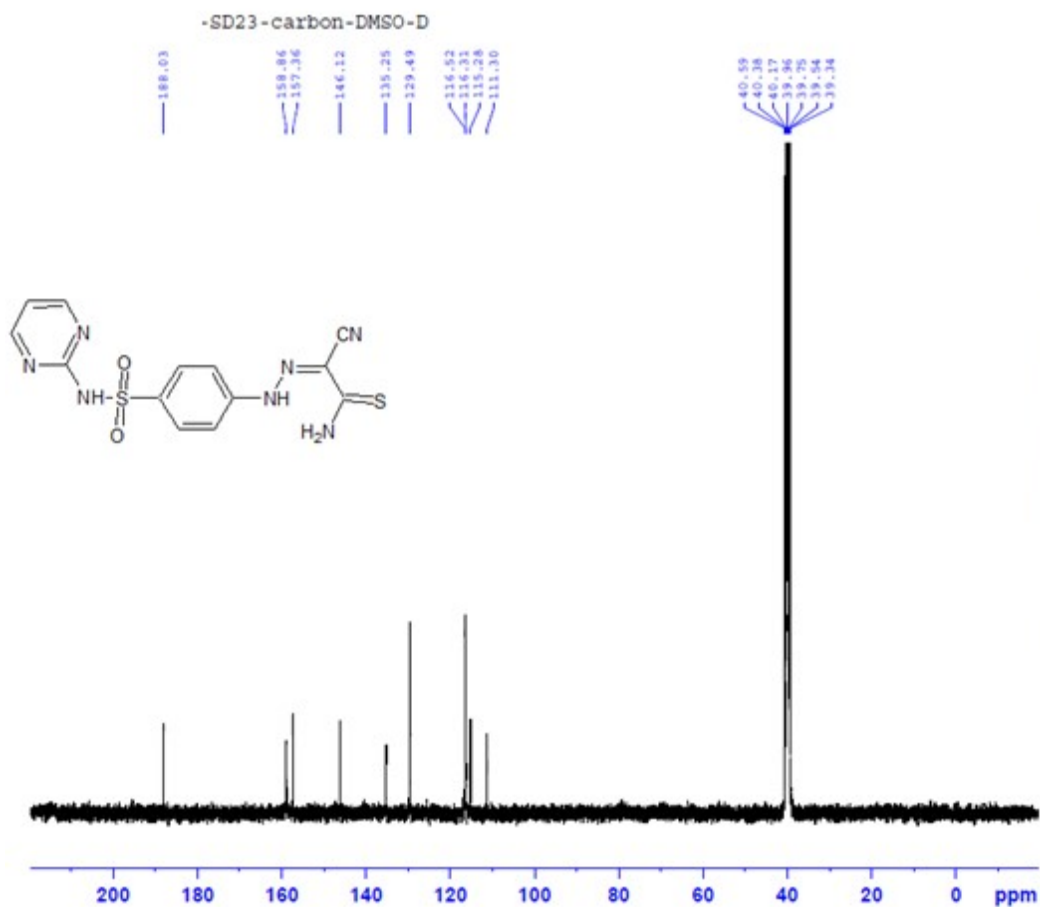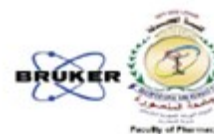

```

Current Data Parameters
NAME      Sahgat-Rana-San-SD23-carbon-DMSO-D
EXPNO    1
PROCNO   1

F2 - Acquisition Parameters
Date_    20210226
Time     16:24 h
INSTRUM  spect
PROBHD   Z106418_0945
PULPROG  zgpg30
TD        65536
SOLVENT  DMSO
NS        3200
DS        4
SWH       34038.461 Hz
FIDRES   0.733294 Hz
AQ        1.3631488 sec
RG        197.77
SM        20.800 usec
SE        6.100 usec
TE        294.1 K
DT        2.0000000 sec
D1        0.03000000 sec
TD0       1
SFO2      100.6261311 MHz
NUC1       13C
P1         10.00 usec
PL1        47.0000000 W
SFO3      400.2016008 MHz
NUC3       1H
CPCPRG2   waltz16
PCPD2     90.00 usec
PLW2      13.0000000 W
PLW12     0.29248000 W
PLW13     0.14713000 W

F2 - Processing parameters
SI         32768
SF         100.6261311 MHz
WDW        EM
SSB        0
LB         1.00 Hz
GB         0
PC         1.40
  
```

Figure s10: <sup>13</sup>C NMR Spectrum of compound 10

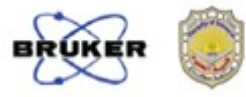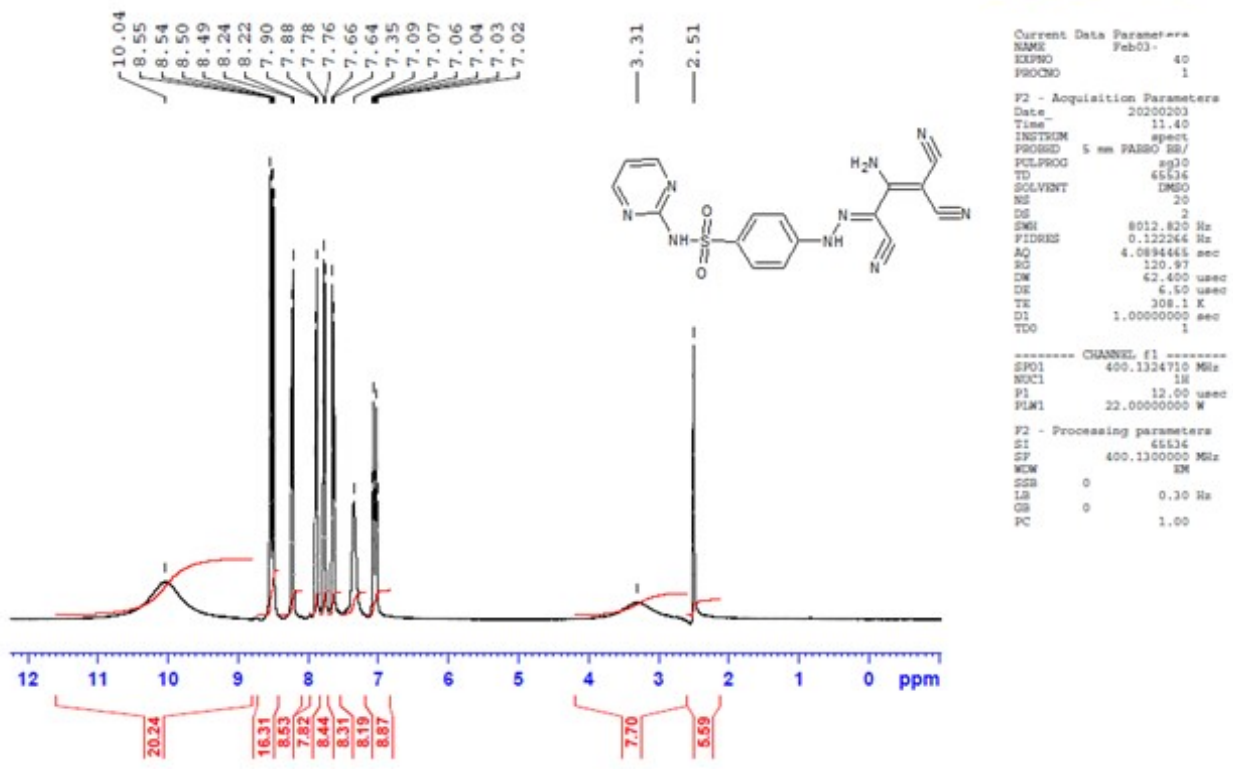

Figure s11: <sup>1</sup>H NMR spectrum of compound 11



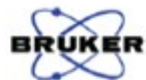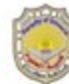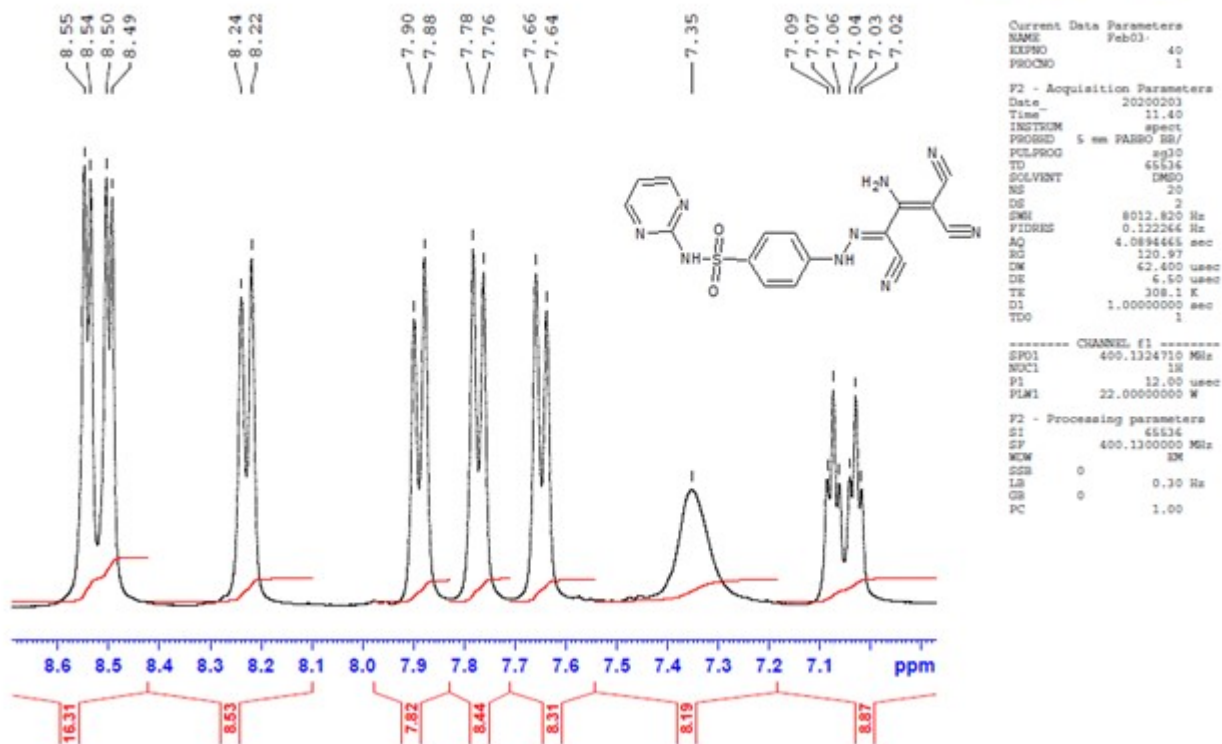

Figure s11: <sup>1</sup>H NMR spectrum of compound 11

SD-6  
 c13\_su DMSO (C:\nmr-data) Student 4

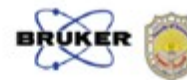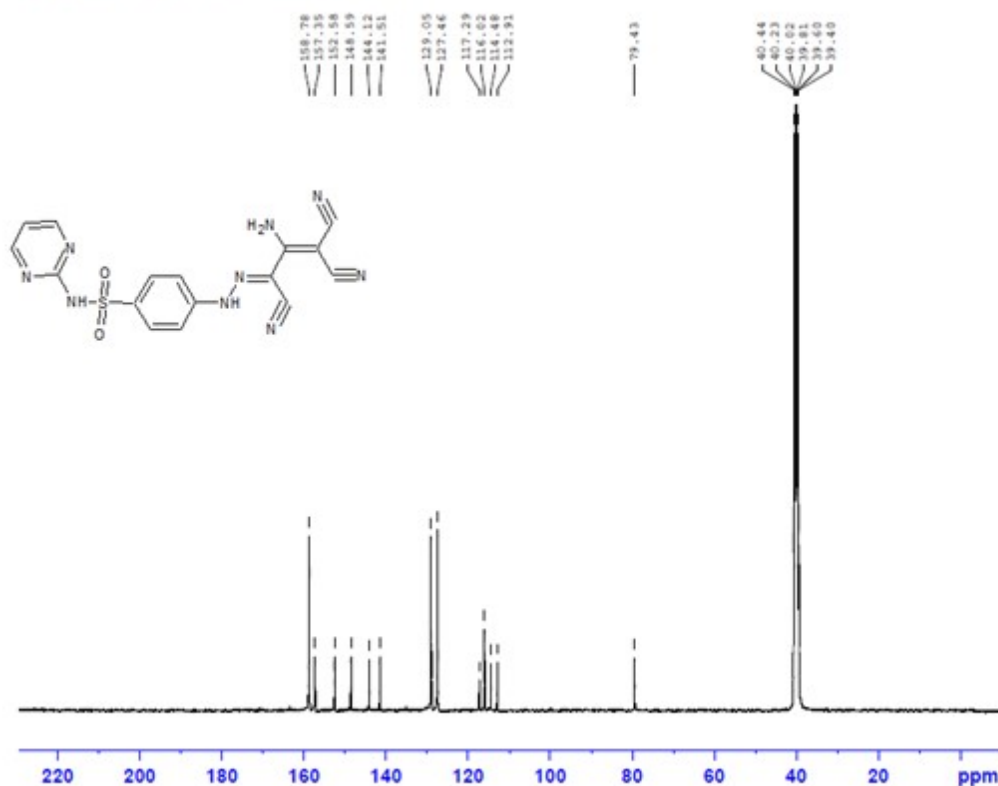

Current Data Parameters  
 NAME Feb13-  
 EXPNO yu  
 PROCNO 1

F2 - Acquisition Parameters  
 Date\_ 20200215  
 Time 3.45  
 INSTRUM spect  
 PROBHD 5 mm PABBO BB/  
 PULPROG zgpg30  
 TD 65536  
 SOLVENT DMSO  
 NS 2500  
 DS 4  
 SWH 24038.461 Hz  
 FIDRES 0.366798 Hz  
 AQ 1.3631488 sec  
 RG 100.43  
 DW 20.800 usec  
 DE 6.50 usec  
 TE 308.1 K  
 D1 2.0000000 sec  
 D11 0.0300000 sec  
 TDO 1

===== CHANNEL f1 =====  
 SFO1 100.6238364 MHz  
 NUC1 13C  
 P1 9.50 usec  
 PLM1 56.00000000 W

===== CHANNEL f2 =====  
 SFO2 400.1316005 MHz  
 NUC2 1H  
 CPDPRG[2] waltz16  
 PCPD2 90.00 usec  
 PLM2 22.00000000 W  
 PLM12 0.41091001 W  
 PLM13 0.33284000 W

F2 - Processing parameters  
 SI 32768  
 SF 100.6127690 MHz  
 WDW EM  
 SSB 0  
 LB 6.00 Hz  
 GB 0  
 PC 1.40

Figure s12: <sup>13</sup>C NMR Spectrum of compound 11

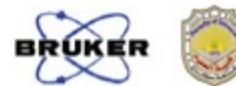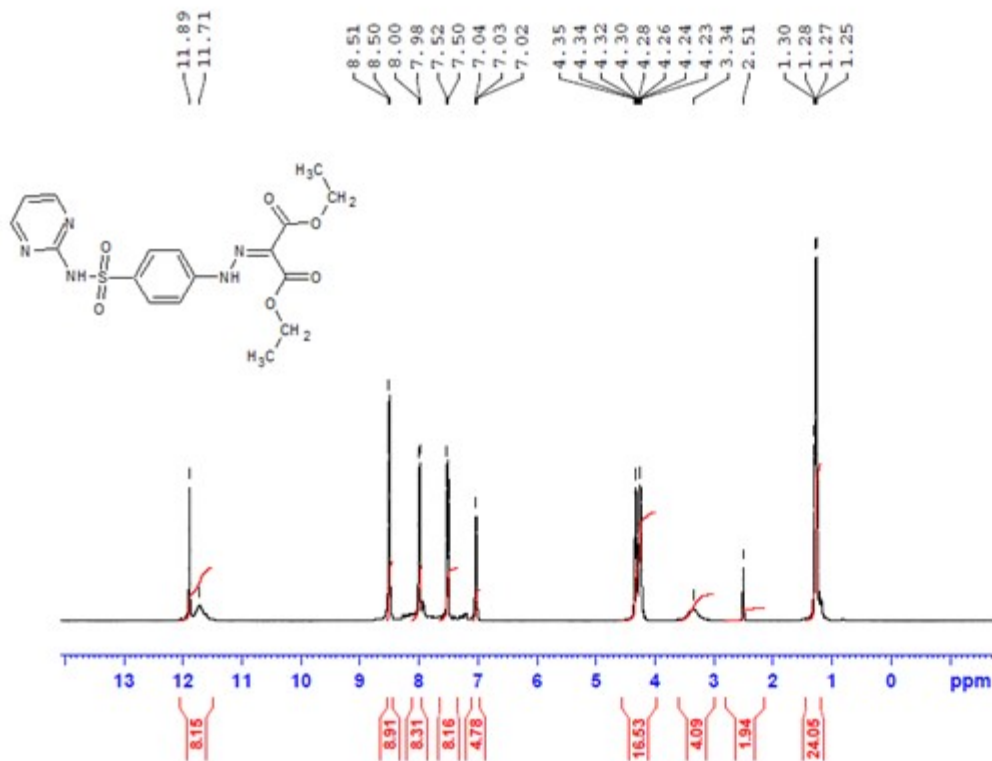

```

Current Data Parameters
NAME      Feb03-
EXPRO    sv
PROCNO    1

F2 - Acquisition Parameters
Date      20200203
Time      11.44
INSTRUM   spect
PROBHD    5 mm PABBO BB/
PULPROG   zg30
TD         65536
SOLVENT    DMSO
NS         20
DS         2
SWE        8012.820 Hz
FIDRES    0.122266 Hz
AQ         4.0894465 sec
RG         68.22
DM         62.400 usec
DE         6.50 usec
TE         308.2 K
D1         1.00000000 sec
TDO        1

----- CHANNEL f1 -----
SFO1      400.1324710 MHz
NUC1       1H
P1         12.00 usec
PLM1       22.00000000 W

F2 - Processing parameters
SI         65536
SF         400.1300000 MHz
WCM        EM
SGB        0
LB         0.30 Hz
GB         0
PC         1.00
  
```

Figure s13: <sup>1</sup>H NMR spectrum of compound 12

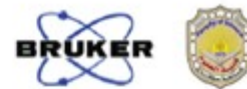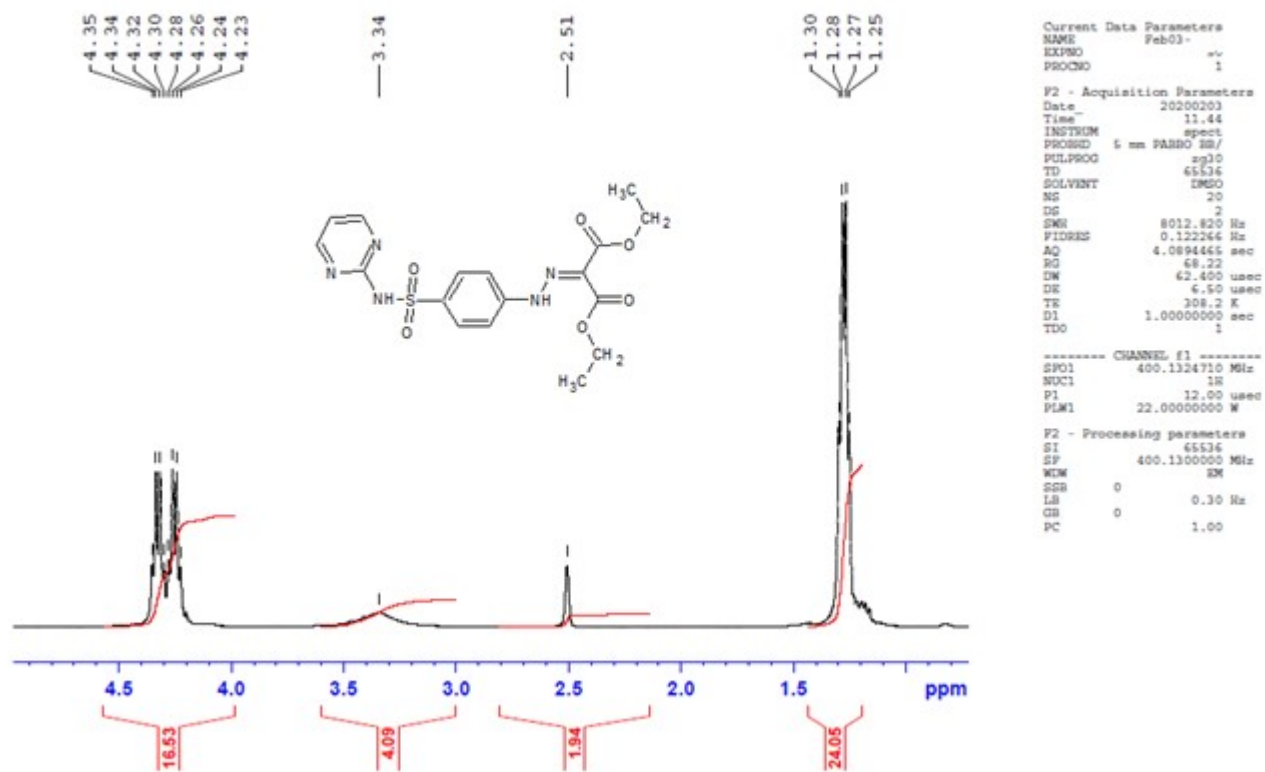

Figure s13: <sup>1</sup>H NMR spectrum of compound 12

SD-7  
c13\_su DMSO {C:\nmr-data} Student 5

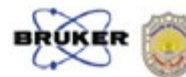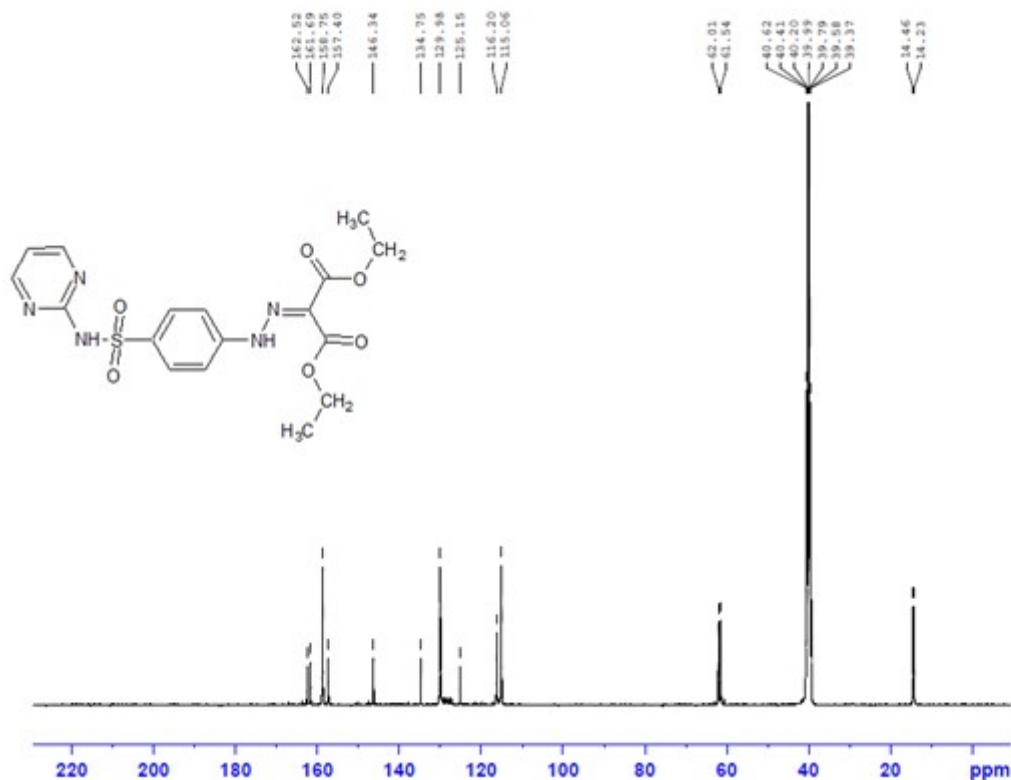

Current Data Parameters  
NAME Feb13-  
EXPRO 100  
PROCNO 1

F2 - Acquisition Parameters  
Date 20200215  
Time 6.11  
INSTRUM spect  
PROBHD 5 mm PABBO BB/  
PULPROG zgpg30  
TD 65536  
SOLVENT DMSO  
NS 2500  
DS 4  
SWH 24038.461 Hz  
FIDRES 0.366798 Hz  
AQ 1.3631488 sec  
RG 100.43  
DW 20.800 usec  
DE 6.50 usec  
TE 308.2 K  
D1 2.0000000 sec  
D11 0.030000000 sec  
TDO 1

===== CHANNEL f1 =====  
SFO1 100.6238364 MHz  
NUC1 13C  
P1 9.50 usec  
PLW1 56.00000000 W

===== CHANNEL f2 =====  
SFO2 400.1316005 MHz  
NUC2 1H  
CPCPRG[2] waltz16  
PCPD2 90.00 usec  
PLW2 22.00000000 W  
PLW12 0.41091001 W  
PLW13 0.33284000 W

F2 - Processing parameters  
SI 32768  
SF 100.6127690 MHz  
WDW EM  
SSB 0  
LB 6.00 Hz  
GB 0  
PC 1.40

Figure s14: <sup>13</sup>C NMR Spectrum of compound 12

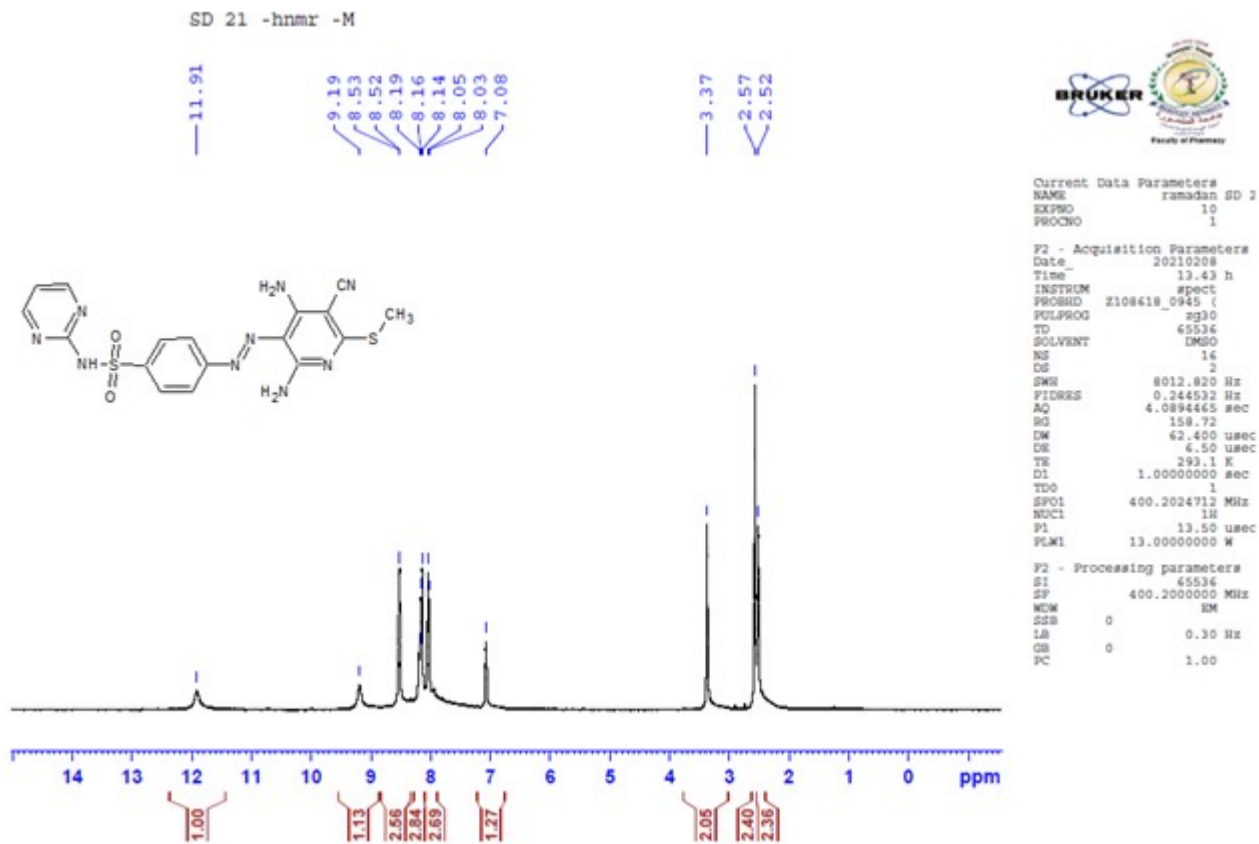

Figure s15: <sup>1</sup>H NMR spectrum of compound 13

-SD-21-D2O-WH

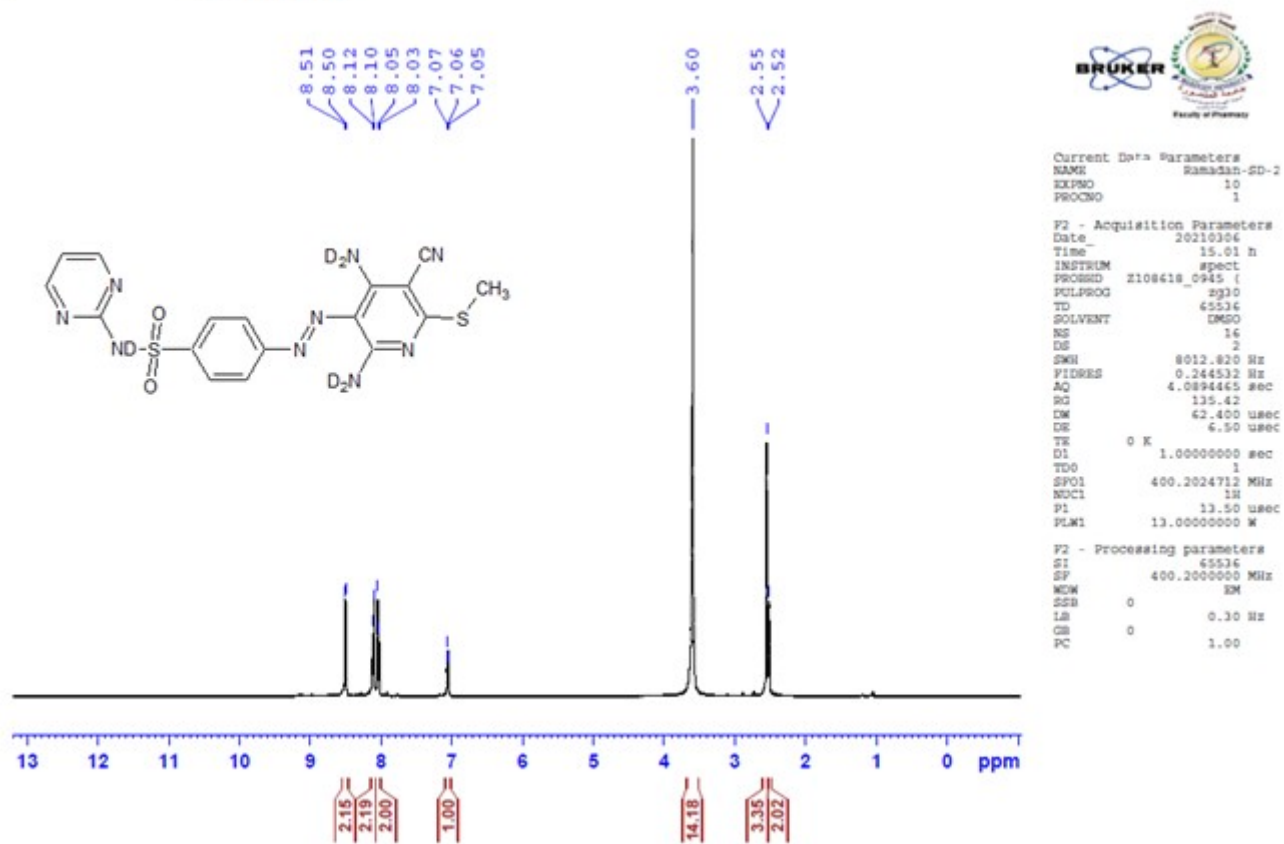

Figure s15: <sup>1</sup>H NMR (D<sub>2</sub>O) spectrum of compound 13

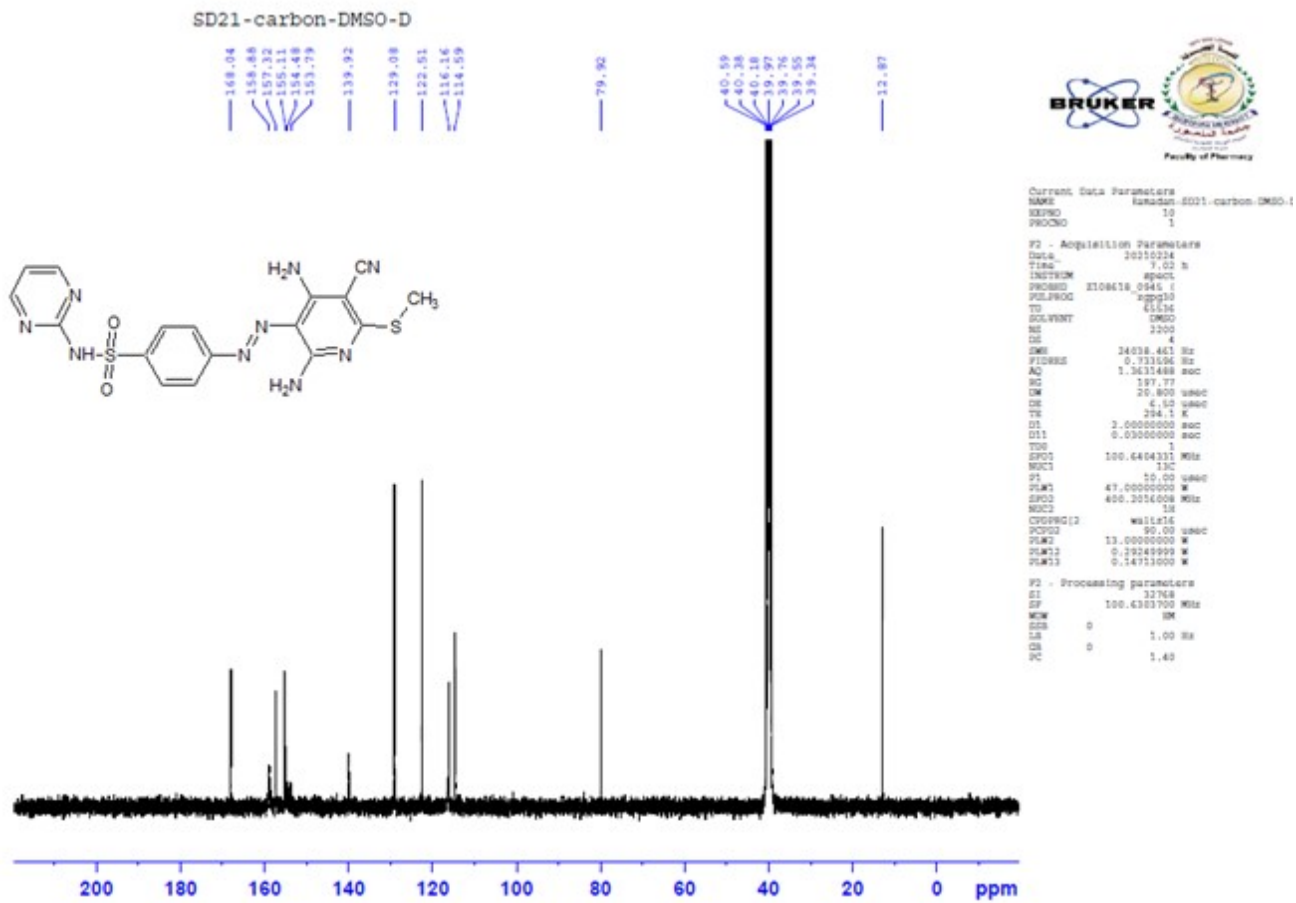

Figure s16: <sup>13</sup>C NMR Spectrum of compound 13



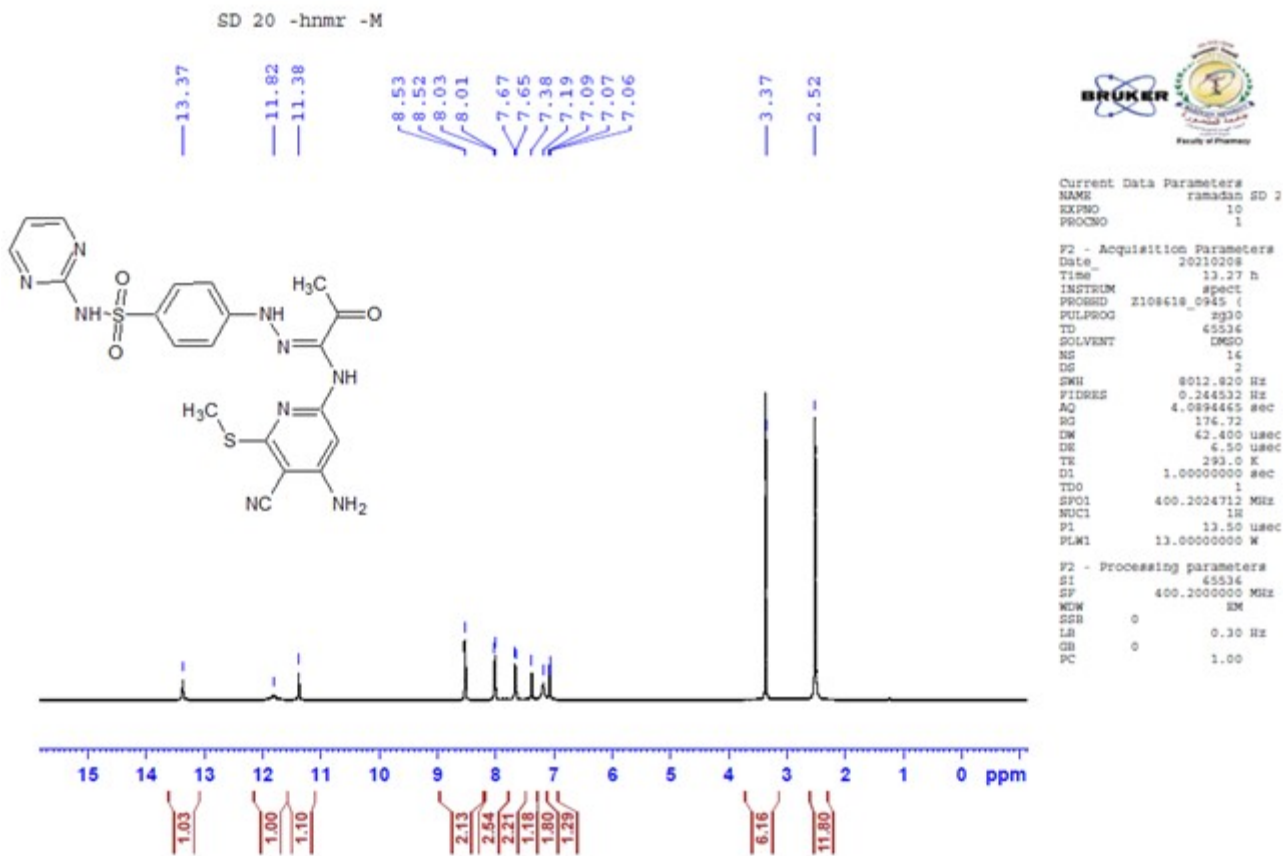

**Figure s17:** <sup>1</sup>H NMR spectrum of compound 14

SD 20 -hnmr -M

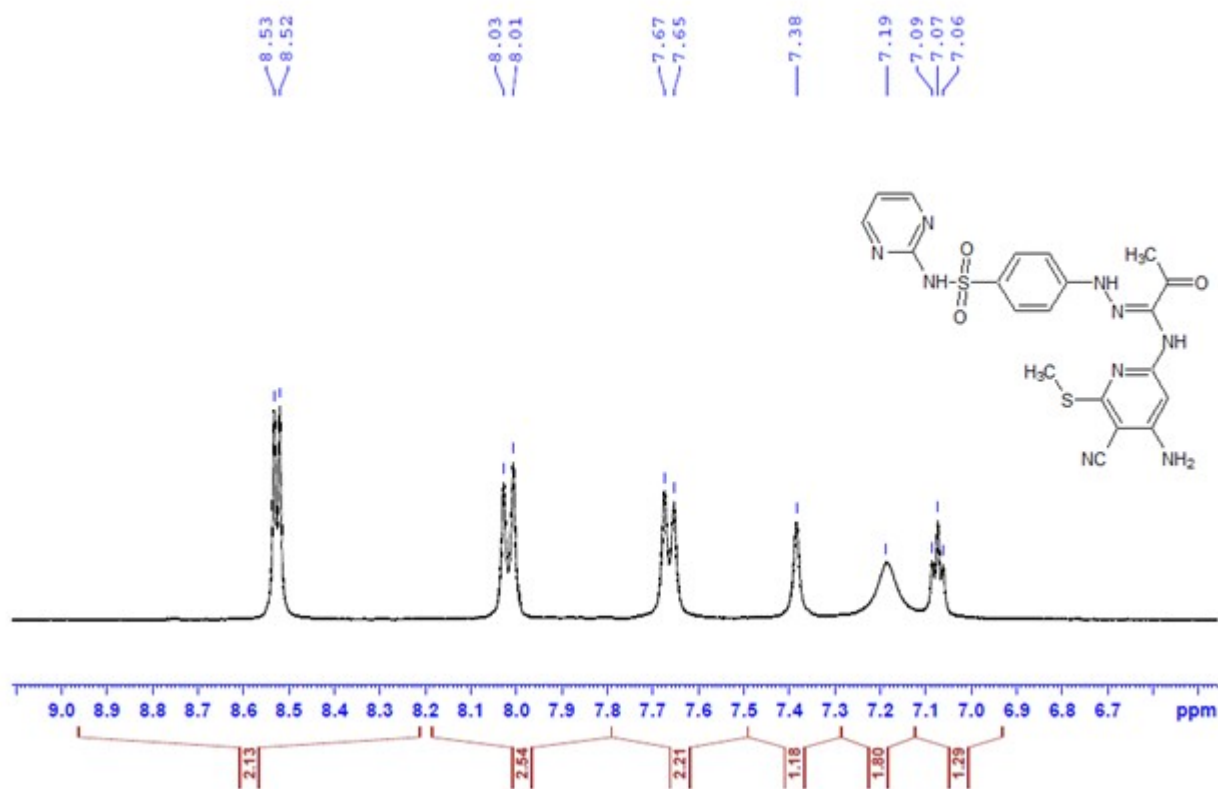

Figure s17: <sup>1</sup>H NMR spectrum of compound 14

A)

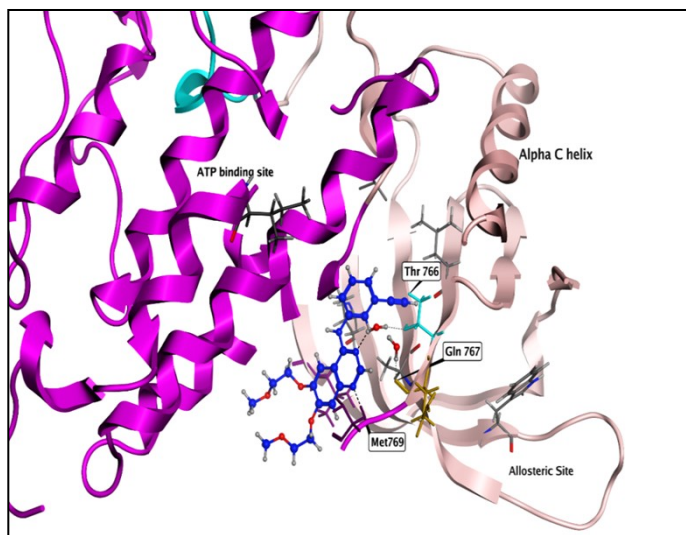

B)

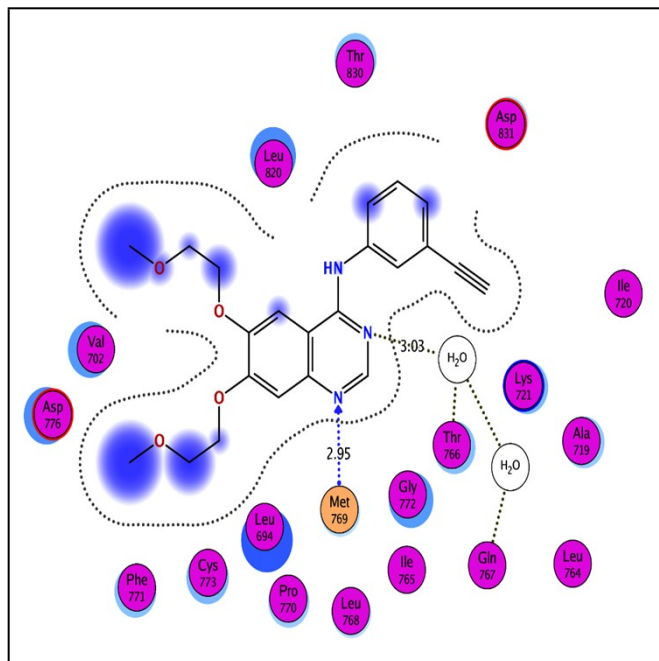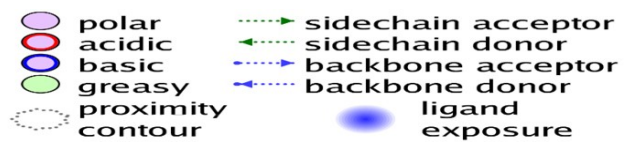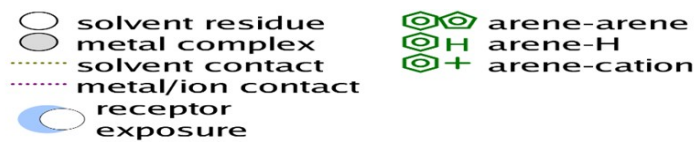

Figure 1S. 3D (A) and 2D images (B) of the co-crystallized erlotinib (blue) within the wild EGFR kinase (PDB code: 4HJO).

A)

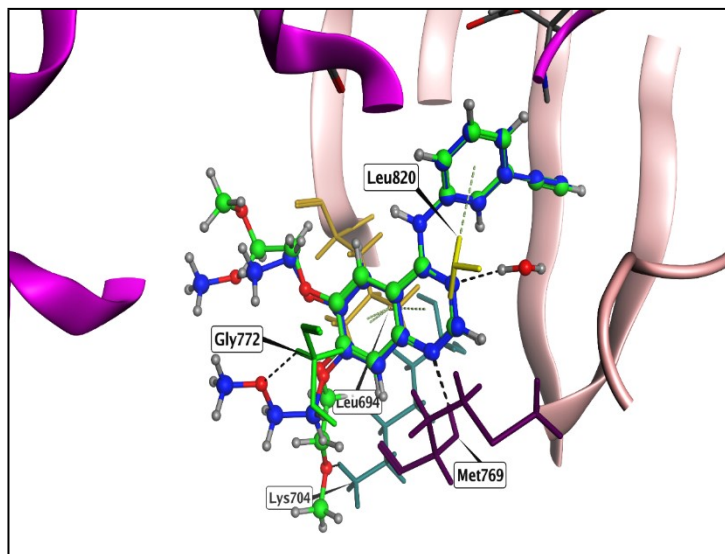

B)

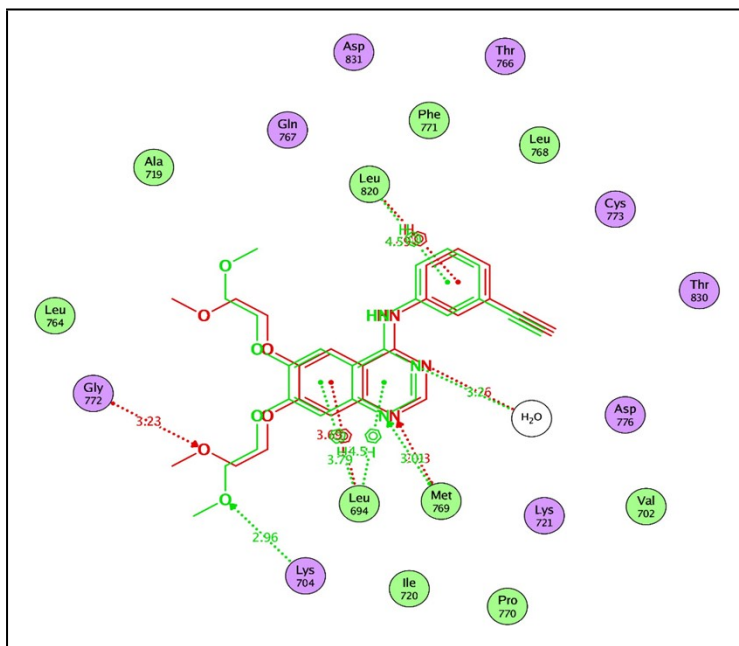

**Figure 2S.** 3D (A) and 2D images (B) of the superimposition of the co-crystallized conformers (blue) over re-docked conformers (green) of erlotinib within the wild EGFR kinase (PDB code: 4HJO).

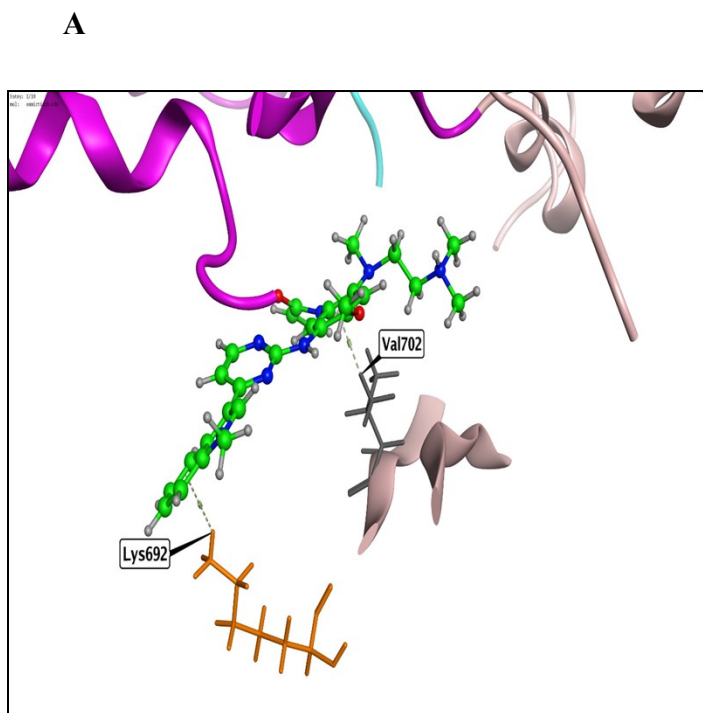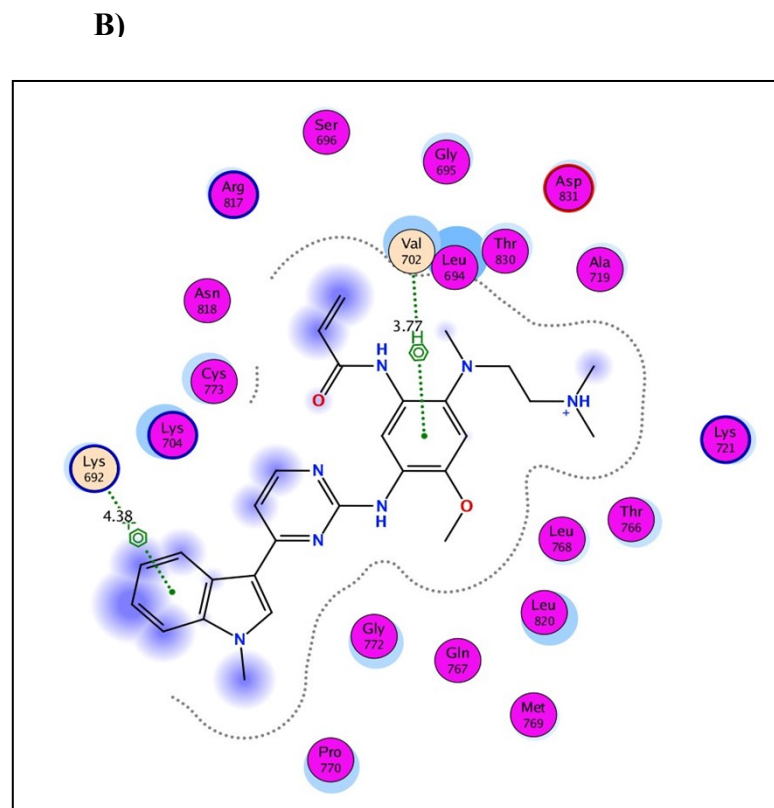

**Figure 3S.** 3D (A) and 2D images (B) of osimertinib (green sticks) within the wild EGFR kinase (PDB code: 4HJO).

A)

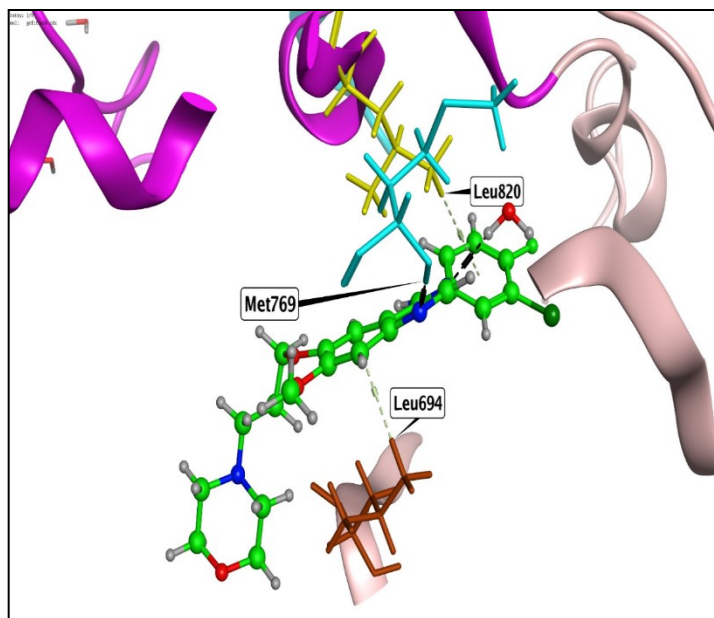

B)

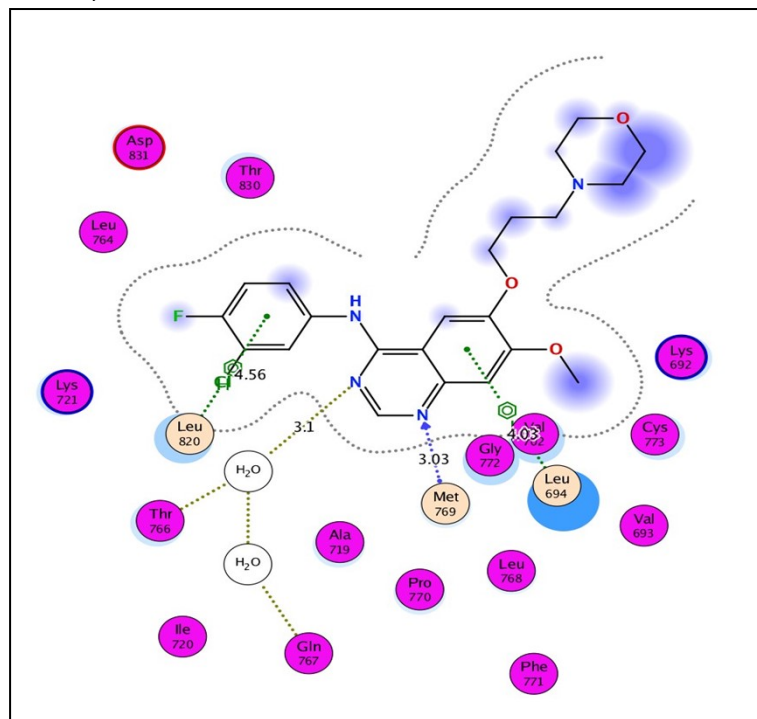

**Figure 4S.** 3D (A) and 2D images (B) of gefitinib (green sticks) within the wild EGFR kinase (PDB code: 4HJO).

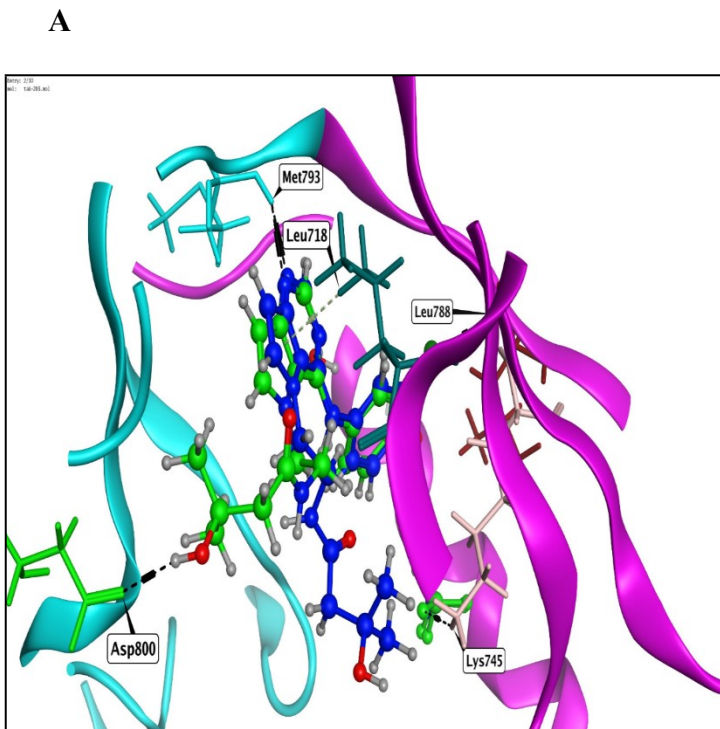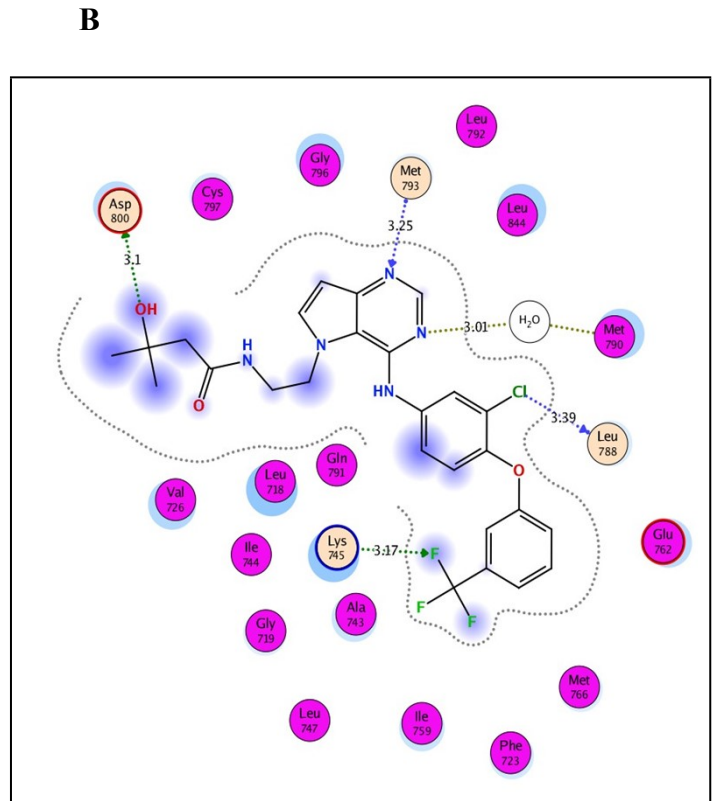

**Figure 5S.** 3D image of the co-crystallized conformers of TAK-285 (blue) over the re-docked conformers (green) (A) and 2D image of the re-docked conformer (green) of TAK-285 within the mutant EGFR<sup>T790M</sup> kinase (PDB code:3W2O) (B).



A)

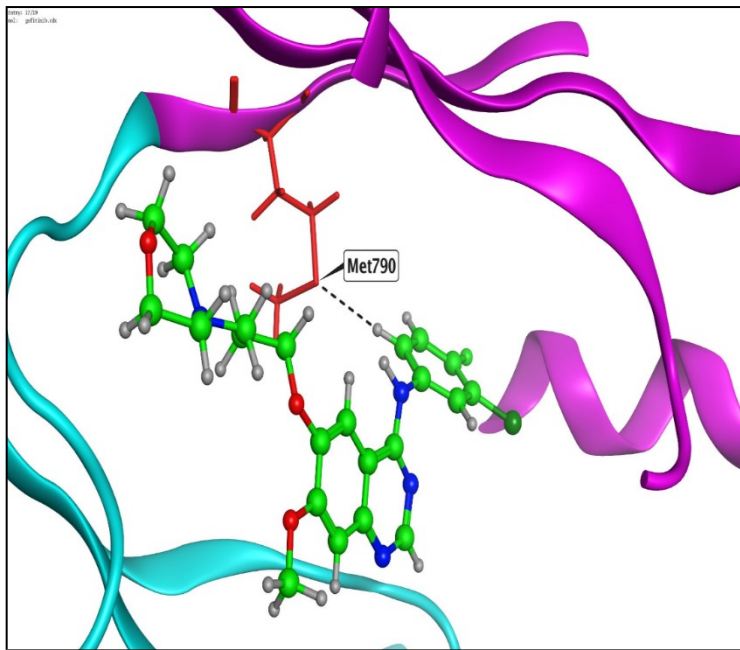

B)

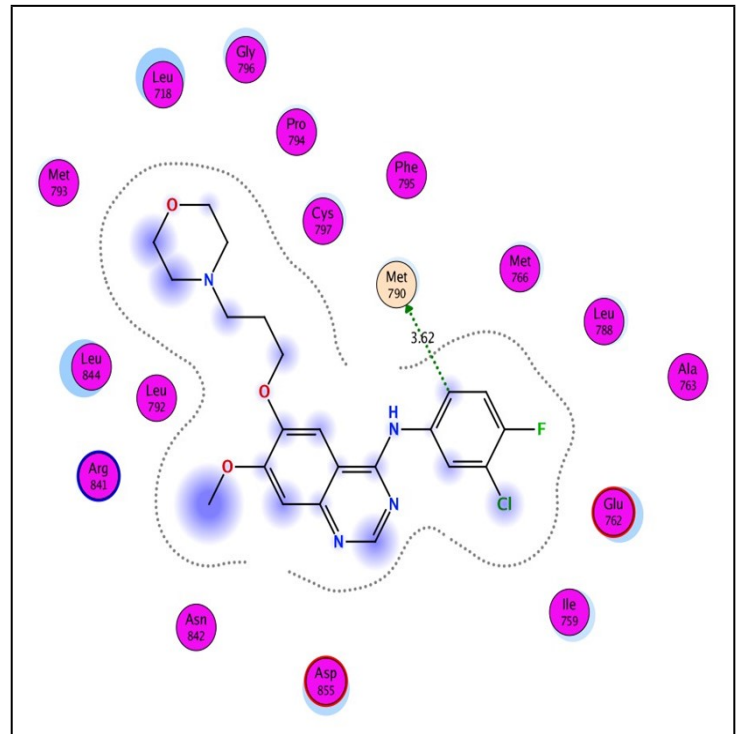

**Figure 6S.** 3D (A) and 2D images (B) of gefitinib (green sticks) within the mutant EGFR<sup>T790M</sup> kinase (PDB code: 3W2O).



A)

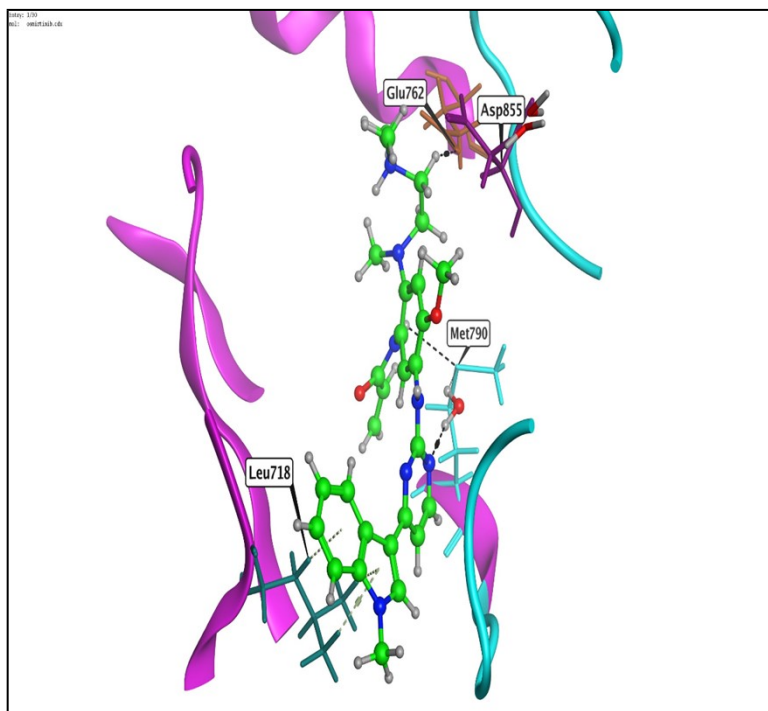

B)

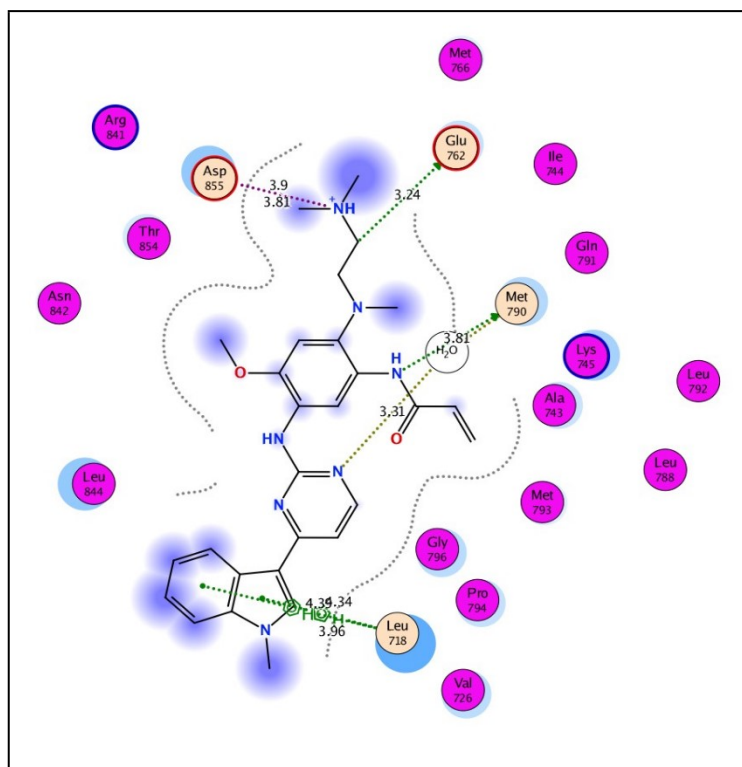

**Figure 7S.** 3D (A) and 2D images (B) of osimertinib (green sticks) within the mutant EGFR<sup>T790M</sup> kinase (PDB code: 3W2O).

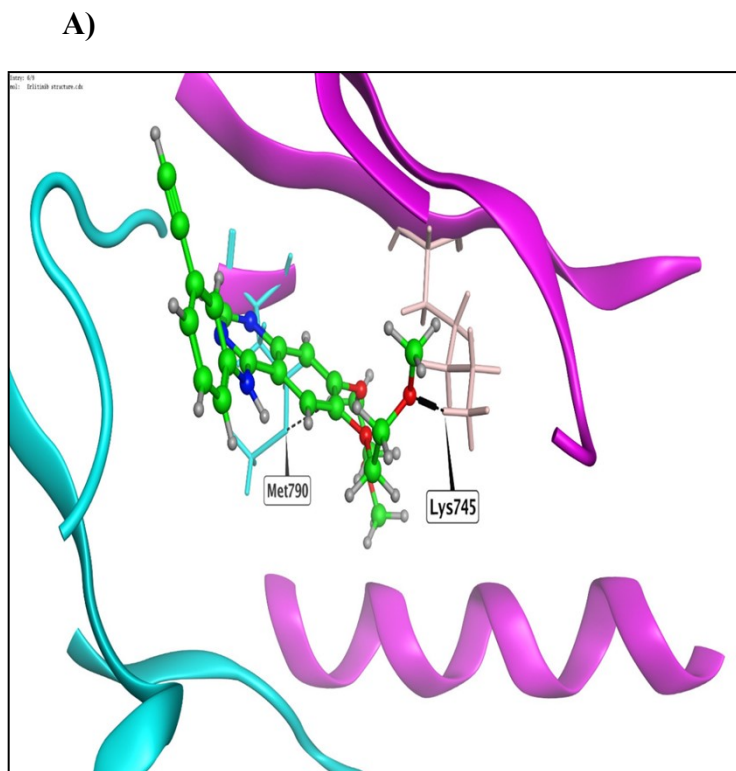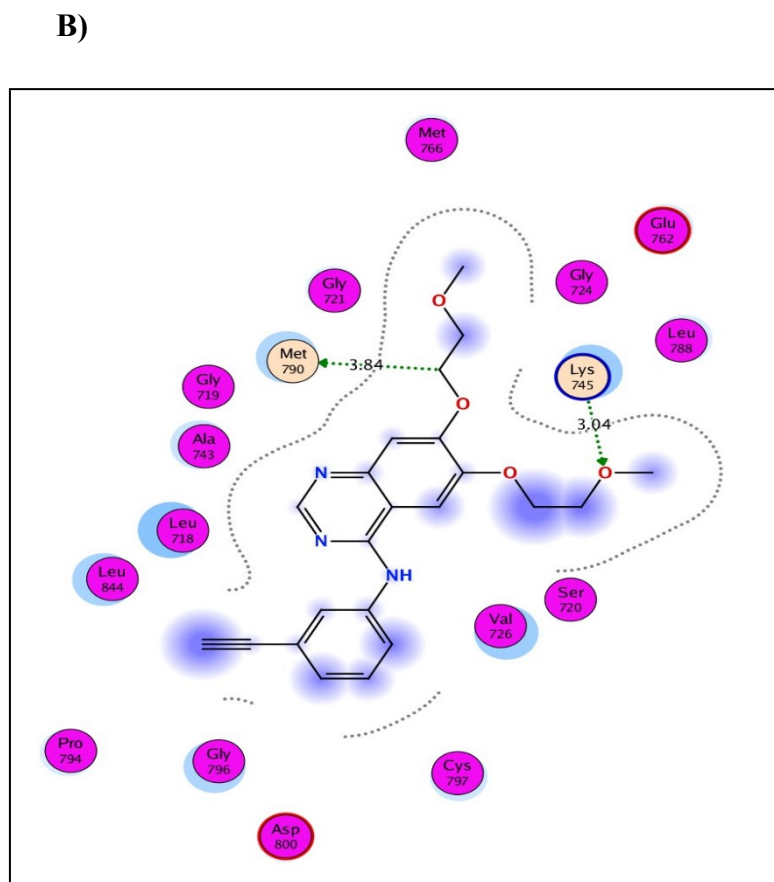

**Figure 8S.** 3D (A) and 2D images (B) of erlotinib (green sticks) within the mutant EGFR<sup>T790M</sup> kinase (PDB code: 3W2O).

**Table S1.** Physicochemical properties, lipophilicity, water-solubility, pharmacokinetics, drug-likeness, medicinal chemistry, and toxicity properties obtained *via* SwissADME and pkCSM websites of compounds **8**, **12**, and **14** the references Erlotinib, and Gefitinib.

| Physicochemical properties            | <b>8</b>                                                        | <b>12</b>                                                                    | <b>14</b>                                                                    | <b>Erlotinib</b>                                              | <b>Gefitinib</b>                                                 |
|---------------------------------------|-----------------------------------------------------------------|------------------------------------------------------------------------------|------------------------------------------------------------------------------|---------------------------------------------------------------|------------------------------------------------------------------|
| Formula                               | C <sub>20</sub> H <sub>17</sub> N <sub>5</sub> O <sub>4</sub> S | C <sub>19</sub> H <sub>13</sub> N <sub>7</sub> O <sub>2</sub> S <sub>2</sub> | C <sub>17</sub> H <sub>15</sub> N <sub>9</sub> O <sub>2</sub> S <sub>2</sub> | C <sub>22</sub> H <sub>23</sub> N <sub>3</sub> O <sub>4</sub> | C <sub>22</sub> H <sub>24</sub> ClFN <sub>4</sub> O <sub>3</sub> |
| Molecular weight                      | 423.45 g/mol                                                    | 435.48 g/mol                                                                 | 441.49 g/mol                                                                 | 393.44 g/mol                                                  | 446.90 g/mol                                                     |
| Num. heavy atoms                      | 30                                                              | 30                                                                           | 30                                                                           | 29                                                            | 31                                                               |
| Num. arom. Heavy atoms                | 18                                                              | 21                                                                           | 12                                                                           | 16                                                            | 16                                                               |
| Fraction Csp3                         | 0.05                                                            | 0.00                                                                         | 0.06                                                                         | 0.27                                                          | 0.36                                                             |
| Num. rotatable bonds                  | 8                                                               | 6                                                                            | 6                                                                            | 10                                                            | 8                                                                |
| Num. H-bond acceptors                 | 7                                                               | 7                                                                            | 8                                                                            | 6                                                             | 7                                                                |
| Num. H-bond donors                    | 2                                                               | 2                                                                            | 4                                                                            | 1                                                             | 1                                                                |
| Molar refractivity                    | 111.67                                                          | 114.36                                                                       | 119.04                                                                       | 111.40                                                        | 121.66                                                           |
| TPSA (topological polar surface area) | 138.86 Å <sup>2</sup>                                           | 169.64 Å <sup>2</sup>                                                        | 216.04 Å <sup>2</sup>                                                        | 74.73 Å <sup>2</sup>                                          | 68.74 Å <sup>2</sup>                                             |
| Lipophilicity                         |                                                                 |                                                                              |                                                                              |                                                               |                                                                  |
| Log P <sub>o/w</sub> (iLOGP)          | 2.02                                                            | 2.43                                                                         | 1.18                                                                         | 3.55                                                          | 4.04                                                             |
| Log P <sub>o/w</sub> (XLOGP3)         | 2.98                                                            | 4.16                                                                         | 1.76                                                                         | 2.63                                                          | 4.11                                                             |
| Log P <sub>o/w</sub> (WLOGP)          | 3.22                                                            | 3.93                                                                         | 1.85                                                                         | 3.07                                                          | 4.32                                                             |
| Log P <sub>o/w</sub> (MLOGP)          | -0.03                                                           | 0.21                                                                         | -1.38                                                                        | 2.06                                                          | 2.55                                                             |
| Log P <sub>o/w</sub> (SILICOS-IT)     | 1.67                                                            | 2.41                                                                         | 0.61                                                                         | 4.77                                                          | 4.31                                                             |
| Consensus Log P <sub>o/w</sub>        | 1.97                                                            | 2.63                                                                         | 0.80                                                                         | 3.22                                                          | 3.86                                                             |
| Water solubility                      |                                                                 |                                                                              |                                                                              |                                                               |                                                                  |
| Log S (ESOL)                          | -4.26                                                           | -5.28                                                                        | -3.59                                                                        | -4.11                                                         | -5.05                                                            |
| Solubility                            | 2.33e-02 mg/ml;<br>5.51e-05 mol/L                               | 2.27e-03 mg/ml;<br>5.21e-06 mol/L                                            | 1.15e-01 mg/ml;<br>2.59e-04 mol/L                                            | 3.03e-02 mg/ml;<br>7.71e-05 mol/L                             | 3.95e-03mg/ml;<br>8.83e-06 mol/L                                 |
| Class                                 | Moderately soluble                                              | Moderately soluble                                                           | Soluble                                                                      | Moderately soluble                                            | Moderately soluble                                               |
| Log S (Ali)                           | -5.56                                                           | -7.43                                                                        | -5.91                                                                        | -4.56                                                         | -5.26                                                            |
| Solubility                            | 1.17e-03 mg/ml;<br>2.76e -06 mol/L                              | 1.62e-05 mg/ml;<br>3.71e -08 mol/L                                           | 5.38e-04 mg/ml;<br>1.22e -06 mol/                                            | 1.10e-02 mg/ml;<br>2.78e-05 mol/L                             | 2.46e-03 mg/ml;<br>5.50e-06 mol/L                                |
| Class                                 | Moderately soluble                                              | Poorly soluble                                                               | Moderately soluble                                                           | Moderately soluble                                            | Moderately soluble                                               |
| Log S (SILICOS-IT)                    | -6.99                                                           | -7.36                                                                        | -5.77                                                                        | -7.26                                                         | -7.94                                                            |
| Solubility                            | 4.29e-05 mg/ml;<br>1.01e-7 mol/L                                | 1.91e-05 mg/ml;<br>4.40e-08 mol/L                                            | 7.57e-04 mg/ml;<br>1.71e-06 mol/L                                            | 2.15e-05 mg/ml;<br>5.46e-08 mol/L                             | 5.14e-06 mg/ml;<br>1.15e-08 mol/L                                |

| <b>Physicochemical properties</b> | <b>8</b>                               | <b>12</b>                           | <b>14</b>                   | <b>Erlotinib</b>                   | <b>Gefitinib</b>                              |
|-----------------------------------|----------------------------------------|-------------------------------------|-----------------------------|------------------------------------|-----------------------------------------------|
| Class                             | Poorly soluble                         | Poorly soluble                      | Moderately soluble          | Poorly soluble                     | Poorly soluble                                |
| <b>Pharmacokinetics</b>           |                                        |                                     |                             |                                    |                                               |
| GI absorption                     | Low                                    | Low                                 | Low                         | High                               | High                                          |
| BBB permeant                      | No                                     | No                                  | No                          | Yes                                | Yes                                           |
| P-gp substrate                    | No                                     | No                                  | Yes                         | No                                 | No                                            |
| CYP1A2 inhibitor                  | No                                     | No                                  | No                          | Yes                                | No                                            |
| CYP2C19 inhibitor                 | Yes                                    | Yes                                 | No                          | Yes                                | Yes                                           |
| CYP2C9 inhibitor                  | Yes                                    | Yes                                 | No                          | Yes                                | Yes                                           |
| CYP2D6 inhibitor                  | No                                     | No                                  | No                          | Yes                                | Yes                                           |
| CYP3A4 inhibitor                  | Yes                                    | Yes                                 | No                          | Yes                                | Yes                                           |
| Log Kp (skin permeation)          | -6.77 cm/s                             | -6.00 cm/s                          | -7.74 cm/s                  | -6.35 cm/s                         | -6.11 cm/s                                    |
| <b>Druglikeness</b>               |                                        |                                     |                             |                                    |                                               |
| Lipinski                          | Yes; 0 violation                       | Yes; 0 violation                    | Yes; 1 violation; NorO>10   | Yes; 0 violation                   | Yes; 0 violation                              |
| Ghose                             | Yes                                    | Yes                                 | Yes                         | Yes                                | Yes                                           |
| Veber                             | Yes                                    | No; 1 violation; TPSA>140           | No; 1 violation; TPSA>140   | Yes                                | Yes                                           |
| Egan                              | No; 1 violation; TPSA>131.6            | No; 1 violation; TPSA>131.6         | No; 1 violation; TPSA>131.6 | Yes                                | Yes                                           |
| Muegge                            | Yes                                    | No; 1 violation; TPSA>150           | No; 1 violation; TPSA>150   | Yes                                | Yes                                           |
| Bioavailability score             | 0.55                                   | 0.55                                | 0.55                        | 0.55                               | 0.55                                          |
| <b>Medicinal chemistry</b>        |                                        |                                     |                             |                                    |                                               |
| PAINS                             | 1 alert: imine-one-A                   | 0 alert                             | 0 alert                     | 0 alert                            | 0 alert                                       |
| Brenk                             | 2 alerts: beto-keto-anhydride, imine-1 | 1 alert: imine-one-A                | 1 alert: imine-one-A        | 1 alert: triple bond               | 0 alert                                       |
| Leadlikeness                      | No; 2 violations: MW>350, Rotors>7     | No; 2 violations: MW>350, XLOG3>3.5 | No; 1 violation: MW>350     | No; 2 violations: MW>350, Rotors>7 | No; 3 violations: MW>350, Rotors>7, XLOG3>3.5 |
| Synthetic accessibility           | 3.17                                   | 3.43                                | 4.25                        | 3.19                               | 3.26                                          |
| <b>Toxicity</b>                   |                                        |                                     |                             |                                    |                                               |

| <b>Physicochemical properties</b>                    | <b>8</b> | <b>12</b> | <b>14</b> | <b>Erlotinib</b> | <b>Gefitinib</b> |
|------------------------------------------------------|----------|-----------|-----------|------------------|------------------|
| AMES toxicity (Yes/No)                               | No       | No        | No        | No               | No               |
| Max. tolerated dose (human) (log mg/kg/day)          | 0.347    | 0.041     | 0.347     | -0.629           | -0.304           |
| hERG I inhibitor (Yes/No)                            | No       | No        | No        | No               | No               |
| hERG II inhibitor (Yes/No)                           | Yes      | Yes       | No        | Yes              | Yes              |
| Oral rat acute toxicity (LD50) (mol/kg)              | 2.364    | 2.446     | 2.007     | 2.676            | 2.688            |
| Oral rat chronic toxicity (LOAEL) (log mg/kg bw/day) | 1.859    | 1.245     | 1.375     | 0.969            | 1.491            |
| Hepatotoxicity (Yes/No)                              | Yes      | Yes       | Yes       | Yes              | Yes              |
| Skin sensitization (Yes/No)                          | No       | No        | No        | No               | No               |
| T. pyriformis toxicity (log µg/L)                    | 0.373    | 0.305     | 0.292     | 0.318            | 0.293            |
| Minnow toxicity (log mM)                             | 1.209    | 0.999     | 1.542     | -1.725           | -1.952           |

Abbreviation: TPSA, topological polar surface area.
